# Supplementary material for: Risk Factors for Bites and Diseases Associated With Black-Legged Ticks: A Meta-Analysis
Source: PubMed Central journal article supplement — Am J Epidemiol. 2019 May 30;188(9):1742–50. doi: 10.1093/aje/kwz130 (PMC6736203; doi:10.1093/aje/kwz130), 2019-05-30
Supplement: kwz130_fischhoff_web_material_final.pdf [file kwz130_fischhoff_web_material_final.pdf]

## WEB MATERIAL

### **Risk Factors for Bites and Diseases Associated With Black-Legged Ticks: A Meta-Analysis**

Ilya R. Fischhoff, Felicia Keesing, and Richard S. Ostfeld

#### Table of Contents

|                              |    |
|------------------------------|----|
| <i>Web Appendix 1.</i> ..... | 2  |
| <i>Web Appendix 2.</i> ..... | 10 |
| <i>Web Table 1.</i> .....    | 15 |
| <i>Web Table 2.</i> .....    | 52 |
| <i>Web Table 3.</i> .....    | 60 |
| <i>Web Figure 1.</i> .....   | 68 |
| <i>Web Figure 2.</i> .....   | 69 |
| <i>Web Figure 3.</i> .....   | 70 |
| <i>Web Figure 4.</i> .....   | 71 |
| <i>Web Figure 5.</i> .....   | 72 |
| <i>References.</i> .....     | 73 |

## Web Appendix 1

### Search Strategy for Identifying Articles on Spatial Risk Factors for People Acquiring Pathogenic *Ixodes scapularis* or *Ixodes pacificus*

#### Criteria:

- Location:
  - States with incidence of at least 1 Lyme disease cases per 100,000 people in 2016 (2), states of the Midwest and Northeast (3), and California, Oregon, and Washington
  - Canadian provinces with incidence of at least 1 case per 100,00 people in 2013, the most recently reported year, and British Columbia (4)
- Risk factors:
  - We included as search terms the direct risk factors of entomological risk and human behavior, the indirect risk factors of host community, land use and land cover, property management, and abiotic variables, and synonyms for these terms.
  - We further drew search terms from the set of variables used by studies included in a meta-analysis on spatial components of tick-borne disease risk (Fischhoff et al., *in revision*). The previous study excluded incidence-based studies. To increase yield of the present search of incidence studies, we added search terms from a sample of incidence studies. For a randomly selected 50% (N = 20) of the incidence studies excluded from the previous study, we extracted relevant variables analyzed by those studies and added these as search terms.
  - Additional search terms were taken from the text and images of the Lyme disease website of the CDC (5) and the Tick Management Handbook of the Connecticut Agricultural Experiment Station (6).
  - Exclude: Articles on irrelevant locations, hosts, vectors, and topics (e.g., physiology, symptoms, treatment)
- Vectors / pathogens: *Ixodes scapularis* or *I. pacificus*, or pathogens transmitted by these species
- Language: English
- Publication types: Article OR Book Chapter OR Correction OR Correction, Addition OR Data Paper OR Early Access OR Note OR Proceedings Paper OR Retraction)

*Advanced search in Web of Science matching above criteria:*

TS = (( United States OR California OR Connecticut OR Delaware OR District of Columbia OR Kansas OR Illinois OR Iowa OR Indiana OR Maine OR Maryland OR Massachusetts OR

Michigan OR Minnesota OR Missouri OR Montana OR Nebraska OR New Hampshire OR New Jersey OR New York OR North Dakota OR Ohio OR Oregon OR Pennsylvania OR Rhode Island OR South Dakota OR Vermont OR Virginia OR Washington OR West Virginia OR Wisconsin OR

Canad\* OR Manitoba OR Ontario OR Quebec OR Nova Scotia OR British Columbia OR risk\* factor\*)

AND

(*Ixodes scapularis* OR *Ixodes dammini* OR *Ixodes pacificus* OR deer tick OR blacklegged tick OR black-legged tick OR Lyme OR Borreli\* OR Babesi\* OR Powassa\* OR deer tick virus OR Anaplasma\* OR phagocytophil\* OR miyamotoi OR human granulocytic ehrlich\* OR Ehrlichia chaffeensis) AND

(risk\* factor\* OR case-control OR case\* OR Odds Ratio OR longitudinal OR seropositive OR seroprevalen\* OR incidence OR survey OR relative risk OR peridomestic\* OR peri-domestic OR non-peridomestic OR nonperidomestic\* OR neighbor\* OR

acaricide\* OR insecticide OR

acaricide\* OR spray\* OR

acorn OR

activity OR expos\* OR

age OR hous\* OR

animal\* OR deer OR raccoon\* OR stray dog\* OR fence\* OR

avoid\* OR brush\* OR

avoid\* OR brush\* OR high grass\* OR leaf litter OR

avoid\* OR prevent\* OR self protect\* OR

barrier\* OR wood chip\* OR gravel OR

bath\* OR shower\* OR wash\* off OR find\* & tick\* OR crawl\* OR

bathe\* OR yard\* OR  
Bird\* OR feed\* OR  
birdfeeder OR  
blacklegged tick OR  
camp\* OR  
children OR outdoor OR sports OR  
Clear\* brush\* OR  
clear\* grass\* OR clear\* brush\* OR  
Clear\* litter OR  
cloth\* OR permethrin OR  
Court\* OR garden OR woods OR  
coyote\* OR  
Deer damage\* OR  
deer OR  
deer OR fenc\* OR  
deer population density OR  
deer tick OR  
deer vehicle accidents OR  
Densit\* infect\* nymph\* OR  
density development OR less developed OR  
developed land\* OR  
developed OR  
developed OR landscape\* OR  
development level\* OR  
Distance\* forest\* OR  
Dog OR household OR  
dry barrier OR barrier OR lawn OR woods OR  
dry\* cloth\* tick OR heat tick\* cloth OR  
ecologic region OR  
ecosystem OR biotic OR abiotic OR weather OR  
edge OR  
edge\* OR  
entomologic\* OR  
entomologic\* risk\* index OR

entomological risk OR  
entomological risk\* index OR  
feed birds OR  
feed mammals OR  
Feed\* birds property OR  
fence OR  
find\* tick\* OR during search OR  
Fish\* OR  
forest OR  
forest OR shrub OR grass OR  
forest patch area OR  
forest\* density OR  
forest\* land\* OR  
forest\* OR  
forest\* OR fragment\* OR  
forest\* OR patch\* OR  
Found tick OR  
four-poster OR 4-poster OR  
furniture OR mattress\* OR trash OR hide\* OR  
garden\* OR  
gear OR pet\* OR attach person OR coat\* OR  
golf\* OR  
Ground cover OR  
Groundhog\* OR  
herbaceous developed land\* OR  
herbaceous land\* cover OR  
herbaceous OR  
herbaceous OR forest\* OR  
herbaceous\* OR  
hik\* OR  
host communit\* OR wildlife OR  
human behav\* OR behav\* person OR behav people OR  
Hunt\* OR  
infect\* Borrelia burgdorferi OR nymph\* Borrelia burgdorferi OR tick\* Borrelia burgdorferi OR

Ixodes scapularis OR Ixodes pacificus OR  
Ixodes scapularis OR Ixodes pacificus OR nymphs OR  
job\* wood\* OR  
land use develop\* OR land use OR  
land use OR land cover OR landscape OR  
Landscap\* tick\* control\* OR  
landscape\* OR  
latitude\* OR  
Leaf litter OR  
light color\* cloth\* OR  
log pile OR yard OR  
long pant\* OR  
long-sleeved OR  
mice OR deer OR rodent\* OR white-footed mouse OR eastern chipmunk OR  
Mice OR mouse OR  
mouse abundan\* OR  
Mow\* OR lawn OR grass OR  
normalized difference vegetation index OR NDVI OR  
nymphal tick\* OR  
Occupat\* OR  
oil of lemon eucalyptus, OR para-menthane-diol, OR 2-undecanone OR  
outdoor OR job\* OR  
outdoor OR recreat\* OR  
outdoor work\* OR  
outdoor\* OR tick habitat OR woods OR field\* OR activit\* OR  
outdoor\* OR work\* OR  
outdoor\* tick habitat woods fields OR  
outdoors OR yard OR  
Outside OR work\* OR  
Own\* cat OR  
Own\* dog OR  
Own\* horse OR  
Own\* pet OR  
Palmer Hydrologic Drought Index OR

pant\* socks OR  
patch\* OR edge\* OR  
perimeter\* OR  
Permethrin OR bifenthrin OR carbaryl OR cyfluthrin OR deltamethrin OR lambda-cyhalothrin  
OR Pyrethrin OR  
permethrin OR cloth\* OR gear OR boot\* OR pant\* OR sock\* OR tent\* OR  
pesticide\* OR  
pets OR home OR  
Picnic OR  
playground OR decks OR patio OR  
population density OR  
precipitation\* OR  
preventive OR  
propert\* management OR residen\* management OR tick control OR  
Protect\* cloth\* OR  
protective OR measure\* OR use\* OR  
proximity wooded OR  
red fox OR  
repel\* OR DEET OR picaridin OR IR3535 OR expos\* skin OR  
repellent\* OR  
ride Horse\* OR  
rock\* wall\* OR  
rodent control OR  
Rural OR  
Shrub OR land OR  
Single family home OR  
slope OR  
Soils OR  
spen\* vegetation OR  
stack\* wood\* OR dry wood area OR discourage rodent\* OR  
stone\* wall\* OR  
Suburb\* OR  
summer precipitation OR  
summer\* temperature\* OR  
surface\* water\* OR

temperature\* OR  
tick abundance OR  
tick bite OR  
tick bite recog\* OR  
tick check OR tick infested OR  
tick remov\* OR  
tick repellent\* OR  
tick safe zone OR  
tick\* abundan\* OR  
tick\* check\* OR  
tick\* densit\* OR  
tick\* pet OR  
trim branch\* OR  
Tuck pant\* sock\* OR  
Unpowered OR  
Urban OR  
vegetable\* OR garden\* OR  
village\* OR  
Visit parks OR  
Visit\* risk region OR  
Walk outdoor\* OR jog OR  
Walk wood\* OR jog OR  
walk\* OR center OR trail\* OR  
winter\* temperature\* OR  
wood pile OR wood chip OR barrier OR  
wood\* yard\* OR  
Woodpile\* OR wood pile OR  
Woods OR  
woods OR recreat\* OR woods OR play\* OR  
woods propert\* OR wood\* neighbor\* OR wood\* county OR  
work\* OR recreation\* OR outdoor\* OR home\* OR repellent\* OR  
work\* outdoor\* OR  
yard work OR  
yard\* land\* OR yard\* home\* OR home\*

---



)

NOT

(Europe\* OR Austria OR Italy OR Belgium OR Latvia OR Bulgaria OR Lithuania OR Croatia OR Luxembourg OR Cyprus OR Malta OR Czech Republic OR Netherlands OR Denmark OR Poland OR Estonia OR Portugal OR Finland OR Romania OR France OR Slovakia OR Germany OR Slovenia OR Greece OR Spain OR Hungary OR Sweden OR Ireland OR United Kingdom OR Switzerland OR China OR Africa\* OR Kenya OR Brazil OR Turkey OR Zimbabwe OR India OR Ghana OR Sri Lanka OR Asia\*))

NOT

TI = (canine OR horse\* OR cat\* OR feline OR chicken\* OR fox\* OR raccoon\* OR bird\* OR Rhipicephalus OR *Boophilus* OR Amblyomma OR Argasidae OR Dermacentor OR *Haemaphysalis* OR affinus OR host OR detection OR surg\* OR blood\* OR genom\* OR enzym\* OR RNA OR reservoir OR DNA OR microb\* OR card\* OR molec\* OR protein\*)

AND Language: English

AND publication type: Article OR Book Chapter OR Correction OR Correction, Addition OR Data Paper OR Early Access OR Note OR Proceedings Paper OR Retraction)

## Web Appendix 2

### Procedures for Converting Data Types to Log Odds Ratios and Log Odds Ratio Standard Errors

#### *Odds ratio*

If a study reported the odds ratio, risk ratio, or rate ratio and confidence intervals associated with a risk factor, these ratio values were used to calculate the log odds ratio and log standard error. If the reported odds ratio was zero, this would result in an undefined log odds ratio value; therefore, a small number (0.0001) was added to these odds ratio and confidence interval values. If the log standard error equaled zero, this would prevent the data being used in meta-analysis; therefore, a small number (0.01) was added to all log standard error values.

#### *Odds ratio, multiple values per variable*

If multiple odds ratio values were reported for a variable and study, the log standard error was estimated across the log odds ratio values and assumed to apply to each data point in the set. A pooled estimate of the log odds ratio value was computed across the set of reported log odds ratio values.

#### *Case control, continuous predictor*

For studies reporting means and standard deviations for continuous predictors (e.g. hours per week in an activity) for cases and controls, these data were used to calculate the standardized mean difference  $d$ , between cases and controls, and the standard error around  $d$ ,  $SE_d$  using function “escal” in package “metafor” (7). Then we converted from  $d$  to the log odds ratio:

$\text{Log}(\text{OddsRatio}) = d \frac{\pi}{\sqrt{3}}$ , and from  $SE_d$  to the log standard error:  $\text{Log}(\text{SE}) = SE(d) \frac{\pi}{\sqrt{3}}$  (8). If a

study did not report the standard deviation or other measure of variance around the continuous predictor, but did report a P value, then the latter was used to obtain the standard deviation (9). If the study provided neither standard error nor P value, then the missing standard deviation values were multiply imputed based on repeated random draws from the standard deviation values reported across all studies. Simulation studies indicate ecological meta-analysis results are robust to use of multiple imputation (10), which was accomplished using the R package “mi”.

#### *Case control counts, categorical predictor*

If case control data were reported (cases and controls with and without a risk factor), then log odds ratios and log standard errors were calculated using the Mantel-Hanszel method (function “rma.mh” in R package “metafor”). Where case control data were provided for more than categories of a factor, then the category with the lowest risk was designated the control level. IN that case, odds ratios were calculated between the control level and each other category. A pooled estimate was computed across all the log odds values for a given variable and study.

#### *Cases and population size, two or more categories within a variable*

If cases, but not population size, were reported at the U.S. county or state level, then population data were obtained from the Census for the relevant age, sex, origin, or race (11). If cases and population were reported for multiple categories of people (e.g. age classes), then the incidence rate ratio was calculated for each category. Then log odds ratios and log standard errors were calculated for each category with incidence greater than that of the lowest-incidence category. In computing log odds ratios, the Mantel-Haenszel method was applied with cases and population size for the category with the lowest incidence considered the control data, while each category

with higher incidence was considered, in turn, the treatment data (12). Using meta-analysis, a pooled log odds estimate was then found across all the log odds ratios for a given variable within a study.

#### *Incidence in relation to predictor values*

If multiple incidence and risk factor data were reported for a variable and study, then a generalized linear model (GLM) was constructed predicting incidence based on risk factor values. Incidence was rounded to the nearest integer value. The GLM was constructed using the “glm” function in base R, with poisson-distributed errors. The log odds ratio value and log standard error were estimated by the beta coefficient and standard error of the beta coefficient in the fitted GLM (13). If a study directly reported the beta coefficient and standard error for a regression, then these were used similarly to estimate the log odds ratio and log standard error (14). If data on percent reporting an outcome (e.g. tick bite) were provided, then a linear model was constructed and the log odds ratio was obtained from the beta coefficient. If incidence or percent values were provided in relation to ranges, rather than means, of predictor values, then the midpoints of the ranges were used.

#### *Cases and population in relation to predictor values*

If cases, population size, and predictor values were reported, then incidence and standard error around incidence values were computed. These data were then used in fixed effects meta-regression against the predictor variable.

### *Cases and population before and after change in a predictor*

For studies reporting cases and population before and after an intervention, values for incidence and log standard error in incidence were first computed (using measure “IR” in “metafor” function “rma”). These values were then used to calculate the standardized mean change from before to after, using measure “SMCR” in function “rma”. The log odds ratio and log standard error were calculated based on this standardized mean difference (8).

### *Rate ratio, before after control impact*

For studies reporting rate ratios, and standard deviation around the rate ratios, before and after an intervention, we found the difference between the impact vs. control log odds ratio, after the intervention, minus the impact vs. control log odds ratio before the intervention. The pooled log

standard error was obtained with the formula:  $\sqrt{SE_{before}^2 + SE_{after}^2}$  (15).

### *Multiple regression*

If a study reported results of multiple regression, then the log odds ratio and log standard error were estimated based on the partial correlation coefficient, and standard error for that coefficient. The partial correlation coefficient was estimated based on the t value for each variable, sample size, and number of predictors in the multiple regression. Partial correlation coefficients were obtained using the “rma” function (measure = “PCOR”) in R package “metafor”.

### *Correlation coefficient and sample size*

If a study reported the sample size and either the correlation coefficient between incidence and predictor value, or the r-squared value and direction of the relationship (positive or negative),

then these values were used to obtain the standard error around the correlation coefficient:

$$SE_r = \frac{\sqrt{1-r^2}}{n-2} \quad (16).$$

For papers that reported the confidence interval around the correlation coefficient, this was used to compute the standard error. The correlation coefficient and standard error around the correlation coefficient were used to compute first the standardized mean difference  $d$  and variance around  $d$ , and then these values were used to obtain the log odds ratio and log standard error (8). If multiple levels were reported for a variable (e.g., multiple years), then a pooled estimate was obtained using function “rma” in package “metafor”.

### *Effect sizes*

If a study reports effect sizes and confidence intervals, these data are used to estimate the log odds ratio and log standard errors using function “rma” in package “metafor”.

## Web Table 1.

### Reclassification of Similar Variables Into Unified Variable Names

|    | Variable                                                                   | Variable.Recategorized   | Count_Variable_Recategorized | Variable.Make.Opposite | Category            |
|----|----------------------------------------------------------------------------|--------------------------|------------------------------|------------------------|---------------------|
| 1  | ethnicity non-hispanic vs ethnicity hispanic                               | hispanic                 | 6                            | 1                      | socio-demographic   |
| 2  | race white vs race black                                                   | non-white                | 6                            | 1                      | socio-demographic   |
| 3  | origin non-hispanic vs origin hispanic                                     | hispanic                 | 6                            | 1                      | socio-demographic   |
| 4  | rural neighborhood (vs. urban or subdivision)                              | pop. density             | 12                           | 1                      | land use land cover |
| 5  | residence in rural area                                                    | pop. density             | 12                           | 1                      | land use land cover |
| 6  | residence in sparsely populated area                                       | pop. density             | 12                           | 1                      | land use land cover |
| 7  | race: white vs. people of color                                            | non-white                | 6                            | 1                      | socio-demographic   |
| 8  | clear litter where lawn met woods                                          | compost / litter / cover | 6                            | 1                      | property management |
| 9  | residential setting relative to village outside village vs. inside village | pop. density             | 12                           | 1                      | land use land cover |
| 10 | race: white vs. non-white                                                  | non-white                | 6                            | 1                      | socio-demographic   |
| 11 | whites vs. non-whites                                                      | non-white                | 6                            | 1                      | socio-demographic   |

|    |                                        |                       |    |    |                     |
|----|----------------------------------------|-----------------------|----|----|---------------------|
| 12 | distance to coastline                  | coast                 | 3  | 1  | land use land cover |
| 13 | rural residence                        | pop. density          | 12 | 1  | land use land cover |
| 14 | residence rural vs suburban            | pop. density          | 12 | 1  | land use land cover |
| 15 | did not use insect repellent           | repellent             | 39 | 1  | self-protection     |
| 16 | rural vs. nonrural residence           | pop. density          | 12 | 1  | land use land cover |
| 17 | suburban vs. urban                     | pop. density          | 12 | 1  | land use land cover |
| 18 | race asian vs race black               | other vs. black       | 2  | NA | socio-demographic   |
| 19 | origin hispanic vs origin non-hispanic | hispanic              | 6  | NA | socio-demographic   |
| 20 | race other vs race black               | other vs. black       | 2  | NA | socio-demographic   |
| 21 | self protection                        | protect generic       | 6  | NA | self-protection     |
| 22 | woods                                  | forest                | 55 | NA | land use land cover |
| 23 | ld awareness                           | awareness             | 23 | NA | self-protection     |
| 24 | outdoor activity                       | activity generic      | 8  | NA | activity            |
| 25 | visited high risk region               | travel risky area     | 3  | NA | activity            |
| 26 | occupational tick exposure             | occupational exposure | 13 | NA | activity            |
| 27 | courtyard, garden or wooded            | cover generic         | 9  | NA | land use land cover |



|    |                                                                |                    |    |    |                     |
|----|----------------------------------------------------------------|--------------------|----|----|---------------------|
| 28 | hours of outdoor recreational activity                         | outdoor recreation | 16 | NA | activity            |
| 29 | clearing brush on and off property                             | landscape control  | 5  | NA | property management |
| 30 | property size >2 acres                                         | yard size          | 6  | NA | land use land cover |
| 31 | camping                                                        | camping            | 7  | NA | activity            |
| 32 | jogging                                                        | walk / jog         | 5  | NA | activity            |
| 33 | time spent outdoors, median: in yard                           | yard work          | 14 | NA | activity            |
| 34 | time spent outdoors, median: in tick habitat                   | time in vegetation | 3  | NA | activity            |
| 35 | average density of host-seeking i. scapularis                  | density ticks      | 10 | NA | entomological risk  |
| 36 | average prevalence of b. burgdorferi infected nymphs           | din                | 14 | NA | entomological risk  |
| 37 | patch isolation                                                | isolation          | 1  | NA | land use land cover |
| 38 | patch size                                                     | cover generic      | 9  | NA | land use land cover |
| 39 | number days >25 c + no precip. nymphal peak - may-jul          | hot / dry          | 9  | NA | abiotic             |
| 40 | number days >25 c + no precip. larval peak - year t-1 aug-sept | hot / dry          | 9  | NA | abiotic             |
| 41 | proportion of correct knowledge questions                      | awareness          | 23 | NA | self-protection     |
| 42 | wear long sleeves                                              | clothing           | 57 | NA | self-protection     |
| 43 | wear long pants                                                | clothing           | 57 | NA | self-protection     |

|    |                                              |             |    |    |                     |
|----|----------------------------------------------|-------------|----|----|---------------------|
| 44 | wear pants tucked into socks                 | clothing    | 57 | NA | self-protection     |
| 45 | repellent deet                               | repellent   | 39 | NA | self-protection     |
| 46 | tick check briefly                           | tick check  | 29 | NA | self-protection     |
| 47 | tick check exposed skin                      | tick check  | 29 | NA | self-protection     |
| 48 | tick check entire body                       | tick check  | 29 | NA | self-protection     |
| 49 | tick check body and scalp                    | tick check  | 29 | NA | self-protection     |
| 50 | natural or organic repellent                 | repellent   | 39 | NA | self-protection     |
| 51 | permethrin                                   | repellent   | 39 | NA | self-protection     |
| 52 | use repellent all the time                   | repellent   | 39 | NA | self-protection     |
| 53 | wear protective clothing all the time        | clothing    | 57 | NA | self-protection     |
| 54 | bathing or showering within two hours        | bathe       | 3  | NA | self-protection     |
| 55 | perform tick check                           | tick check  | 29 | NA | self-protection     |
| 56 | checked body for ticks after outings         | tick check  | 29 | NA | self-protection     |
| 57 | used insect or tick repellent during outings | repellent   | 39 | NA | self-protection     |
| 58 | residence near woods                         | forest      | 55 | NA | land use land cover |
| 59 | residence near any body of water             | water       | 6  | NA | land use land cover |
| 60 | residence near overgrown weeds               | herbaceous  | 20 | NA | land use land cover |
| 61 | fishing                                      | fish / raft | 7  | NA | activity            |
| 62 | residence near pond or lake                  | water       | 6  | NA | land use land cover |

|    |                                      |                     |    |    |                     |
|----|--------------------------------------|---------------------|----|----|---------------------|
| 63 | hunting                              | hunting             | 6  | NA | activity            |
| 64 | temperature variability and altitude | generic abiotic     | 1  | NA | abiotic             |
| 65 | temperature                          | temperature         | 21 | NA | abiotic             |
| 66 | human population density             | pop. density        | 12 | NA | land use land cover |
| 67 | mammalian richness                   | richness            | 5  | NA | host community      |
| 68 | density of infected nymphs           | din                 | 14 | NA | entomological risk  |
| 69 | pesticides for non-ticks             | acaricide           | 6  | NA | property management |
| 70 | fence (deer-exclusion)               | fence               | 7  | NA | property management |
| 71 | repellent                            | repellent           | 39 | NA | self-protection     |
| 72 | mowed lawn                           | yard work           | 14 | NA | activity            |
| 73 | bird feeder                          | feed wildlife       | 10 | NA | property management |
| 74 | dry barrier where lawn met woods     | landscape control   | 5  | NA | property management |
| 75 | bathed                               | bathe               | 3  | NA | self-protection     |
| 76 | tuck pants into socks                | clothing            | 57 | NA | self-protection     |
| 77 | light-colored clothing               | clothing            | 57 | NA | self-protection     |
| 78 | sprayed acaricide                    | acaricide           | 6  | NA | property management |
| 79 | permethrin-treated clothing          | repellent           | 39 | NA | self-protection     |
| 80 | rodent-targeted tick-control         | rodent tick control | 1  | NA | property management |

|    |                                                                                |                   |    |    |                     |
|----|--------------------------------------------------------------------------------|-------------------|----|----|---------------------|
| 81 | log pile                                                                       | wood pile         | 6  | NA | property management |
| 82 | long pants                                                                     | clothing          | 57 | NA | self-protection     |
| 83 | tick checking                                                                  | tick check        | 29 | NA | self-protection     |
| 84 | fence on property (any)                                                        | fence             | 7  | NA | property management |
| 85 | rock wall                                                                      | stone wall        | 7  | NA | property management |
| 86 | garden                                                                         | garden            | 10 | NA | property management |
| 87 | trimmed branches where lawn met woods                                          | landscape control | 5  | NA | property management |
| 88 | setting relative to coast coastal vs. inland                                   | coast             | 3  | NA | land use land cover |
| 89 | lyme disease educational intervention by planned length of stay among visitors | awareness         | 23 | NA | self-protection     |
| 90 | lyme disease educational intervention by nantucket residence                   | awareness         | 23 | NA | self-protection     |
| 91 | visitor vs. resident                                                           | residence time    | 5  | NA | socio-demographic   |
| 92 | lyme disease educational intervention                                          | awareness         | 23 | NA | self-protection     |
| 93 | density of nymphs infected with b. burgdorferi                                 | din               | 14 | NA | entomological risk  |
| 94 | infection rate nymphal ticks with borrelia burgdorferi                         | nip               | 3  | NA | entomological risk  |

|     |                                               |                     |    |    |                     |
|-----|-----------------------------------------------|---------------------|----|----|---------------------|
| 95  | infection rate nymphal ticks with b. microti  | nip                 | 3  | NA | entomological risk  |
| 96  | percent of ticks infected with b. burgdorferi | infected prevalence | 1  | NA | entomological risk  |
| 97  | abundance of adult female ticks               | density adults      | 2  | NA | entomological risk  |
| 98  | abundance of nymphs                           | density ticks       | 10 | NA | entomological risk  |
| 99  | owning a horse                                | horse               | 5  | NA | socio-demographic   |
| 100 | owning a different pet                        | pets / animals      | 12 | NA | socio-demographic   |
| 101 | lawn largest patch index                      | herbaceous          | 20 | NA | land use land cover |
| 102 | lawn edge density                             | herbaceous          | 20 | NA | land use land cover |
| 103 | hours in vegetation                           | time in vegetation  | 3  | NA | activity            |
| 104 | landscape tick control measures               | landscape control   | 5  | NA | property management |
| 105 | shrub class area                              | herbaceous          | 20 | NA | land use land cover |
| 106 | any protective measure                        | protect generic     | 6  | NA | self-protection     |
| 107 | avoiding brush                                | avoid ticks         | 6  | NA | self-protection     |
| 108 | shrub percentage of land                      | herbaceous          | 20 | NA | land use land cover |
| 109 | shrub total edge                              | herbaceous          | 20 | NA | land use land cover |

|     |                                                                                                                                                        |                   |    |    |                     |
|-----|--------------------------------------------------------------------------------------------------------------------------------------------------------|-------------------|----|----|---------------------|
| 110 | owning a dog                                                                                                                                           | dog               | 8  | NA | socio-demographic   |
| 111 | owning a cat                                                                                                                                           | cat               | 8  | NA | socio-demographic   |
| 112 | protective clothing                                                                                                                                    | clothing          | 57 | NA | self-protection     |
| 113 | shrub landscape shape index                                                                                                                            | herbaceous        | 20 | NA | land use land cover |
| 114 | shrub largest patch index                                                                                                                              | herbaceous        | 20 | NA | land use land cover |
| 115 | shrub edge density                                                                                                                                     | herbaceous        | 20 | NA | land use land cover |
| 116 | race: american indian to black                                                                                                                         | american indian   | 3  | NA | socio-demographic   |
| 117 | race: american indian to asian/pacific islander                                                                                                        | american indian   | 3  | NA | socio-demographic   |
| 118 | race: american indian to white                                                                                                                         | american indian   | 3  | NA | socio-demographic   |
| 119 | travel status travel to wooded, brushy, or grassy area in high incidence state vs. no travel to wooded, brushy, or grassy area in high incidence state | travel risky area | 3  | NA | activity            |
| 120 | median duration (years) of residence                                                                                                                   | residence time    | 5  | NA | socio-demographic   |
| 121 | wear long-sleeved shirt                                                                                                                                | clothing          | 57 | NA | self-protection     |
| 122 | deer hunt vs. control town                                                                                                                             | deer hunt         | 5  | NA | host community      |
| 123 | four-poster vs. control town                                                                                                                           | deer four-poster  | 1  | NA | host community      |

|     |                                            |                       |    |    |                     |
|-----|--------------------------------------------|-----------------------|----|----|---------------------|
| 124 | land use: highly developed vs. reference   | developed             | 43 | NA | land use land cover |
| 125 | slope                                      | slope                 | 1  | NA | abiotic             |
| 126 | soil                                       | soils                 | 1  | NA | abiotic             |
| 127 | tick check                                 | tick check            | 29 | NA | self-protection     |
| 128 | clothing repellent                         | repellent             | 39 | NA | self-protection     |
| 129 | skin repellent                             | repellent             | 39 | NA | self-protection     |
| 130 | long sleeves                               | clothing              | 57 | NA | self-protection     |
| 131 | tuck pants                                 | clothing              | 57 | NA | self-protection     |
| 132 | employee role                              | employment            | 3  | NA | socio-demographic   |
| 133 | black, non-hispanic vs. white              | non-white             | 6  | NA | socio-demographic   |
| 134 | employer                                   | employment            | 3  | NA | socio-demographic   |
| 135 | length of service                          | employment            | 3  | NA | socio-demographic   |
| 136 | college education vs. high school or lower | higher ed.            | 1  | NA | socio-demographic   |
| 137 | ground combat vs. not ground combat        | occupational exposure | 13 | NA | activity            |
| 138 | hispanic vs. white                         | hispanic              | 6  | NA | socio-demographic   |
| 139 | highest vs. lowest poverty level           | income                | 9  | NA | socio-demographic   |

|     |                                                             |             |    |    |                 |
|-----|-------------------------------------------------------------|-------------|----|----|-----------------|
| 140 | wear light colored clothing -- heard about                  | clothing    | 57 | NA | self-protection |
| 141 | wear hat to keep ticks out of hair                          | clothing    | 57 | NA | self-protection |
| 142 | tuck pants into socks or boots                              | clothing    | 57 | NA | self-protection |
| 143 | spray self with repellent                                   | repellent   | 39 | NA | self-protection |
| 144 | avoid sandals or going barefoot                             | clothing    | 57 | NA | self-protection |
| 145 | avoid sandals or going barefoot -- heard about              | awareness   | 23 | NA | self-protection |
| 146 | wear long-sleeved shirt -- heard about                      | clothing    | 57 | NA | self-protection |
| 147 | wear long pants -- heard about                              | awareness   | 23 | NA | self-protection |
| 148 | wear long pants today                                       | clothing    | 57 | NA | self-protection |
| 149 | stay on trails -- heard about                               | awareness   | 23 | NA | self-protection |
| 150 | inspect skin during/after hiking                            | tick check  | 29 | NA | self-protection |
| 151 | inspect skin during/after hiking -- heard about             | awareness   | 23 | NA | self-protection |
| 152 | wear light colored clothing                                 | clothing    | 57 | NA | self-protection |
| 153 | avoid areas with long grass, woods, or brush -- heard about | awareness   | 23 | NA | self-protection |
| 154 | avoid areas with long grass, woods, or brush                | avoid ticks | 6  | NA | self-protection |
| 155 | tuck pants into socks or boots -- heard about               | clothing    | 57 | NA | self-protection |
| 156 | spray self with repellent - heard about                     | awareness   | 23 | NA | self-protection |
| 157 | stay on trails                                              | avoid ticks | 6  | NA | self-protection |



|     |                                                                                                |                   |    |    |                     |
|-----|------------------------------------------------------------------------------------------------|-------------------|----|----|---------------------|
| 158 | knowing about at least one precaution                                                          | awareness         | 23 | NA | self-protection     |
| 159 | doing anything today to protect self                                                           | protect generic   | 6  | NA | self-protection     |
| 160 | taking any precautions                                                                         | protect generic   | 6  | NA | self-protection     |
| 161 | percent forest squared                                                                         | forest            | 55 | NA | land use land cover |
| 162 | income                                                                                         | income            | 9  | NA | socio-demographic   |
| 163 | income squared                                                                                 | income            | 9  | NA | socio-demographic   |
| 164 | percent of edge between forest and open rural land, out of all landcover edge in analysis unit | developed-forest  | 20 | NA | land use land cover |
| 165 | percent forest                                                                                 | forest            | 55 | NA | land use land cover |
| 166 | vacationing in endemic county                                                                  | travel risky area | 3  | NA | activity            |
| 167 | (percent herbaceous cover)^2                                                                   | herbaceous        | 20 | NA | land use land cover |
| 168 | household income                                                                               | income            | 9  | NA | socio-demographic   |
| 169 | (household income)^2                                                                           | income            | 9  | NA | socio-demographic   |
| 170 | percent herbaceous edge adjacent to forest                                                     | herbaceous-forest | 5  | NA | land use land cover |
| 171 | percent herbaceous cover                                                                       | herbaceous        | 20 | NA | land use land cover |

|     |                                                                |                          |    |    |                     |
|-----|----------------------------------------------------------------|--------------------------|----|----|---------------------|
| 172 | edge contrast index: percent of edge that is forest-herbaceous | herbaceous-forest        | 5  | NA | land use land cover |
| 173 | number of forest patches <2 ha                                 | forest                   | 55 | NA | land use land cover |
| 174 | percentage forest                                              | forest                   | 55 | NA | land use land cover |
| 175 | landscape area                                                 | cover generic            | 9  | NA | land use land cover |
| 176 | flower garden                                                  | garden                   | 10 | NA | property management |
| 177 | sitting area                                                   | activity area            | 13 | NA | property management |
| 178 | pet ownership                                                  | pets / animals           | 12 | NA | socio-demographic   |
| 179 | tick control for cat                                           | repellent                | 39 | NA | self-protection     |
| 180 | found ticks on pets                                            | tick presence            | 6  | NA | entomological risk  |
| 181 | compost pile                                                   | compost / litter / cover | 6  | NA | property management |
| 182 | dining area                                                    | activity area            | 13 | NA | property management |
| 183 | fencing                                                        | fence                    | 7  | NA | property management |
| 184 | stone walls                                                    | stone wall               | 7  | NA | property management |
| 185 | children's equipment                                           | activity area            | 13 | NA | property management |

|     |                                                                                        |                  |    |    |                     |
|-----|----------------------------------------------------------------------------------------|------------------|----|----|---------------------|
| 186 | dog only                                                                               | dog              | 8  | NA | socio-demographic   |
| 187 | lawn sport area                                                                        | activity area    | 13 | NA | property management |
| 188 | vegetable garden                                                                       | garden           | 10 | NA | property management |
| 189 | both cat and dog                                                                       | pets / animals   | 12 | NA | socio-demographic   |
| 190 | tick control for any pet                                                               | repellent        | 39 | NA | self-protection     |
| 191 | cat only                                                                               | cat              | 8  | NA | socio-demographic   |
| 192 | deer density                                                                           | deer             | 12 | NA | host community      |
| 193 | nymphal tick abundance                                                                 | din              | 14 | NA | entomological risk  |
| 194 | nymphal tick densities in woods                                                        | din              | 14 | NA | entomological risk  |
| 195 | nymphal tick densities in lawn                                                         | din              | 14 | NA | entomological risk  |
| 196 | eri (entomological risk index, average number of infected nymphs per area) lawn) woods | din              | 14 | NA | entomological risk  |
| 197 | after vs. before deer abundance -- winter aerial survey                                | deer hunt        | 5  | NA | host community      |
| 198 | percentage ticks infected with borrelia burgdorferi                                    | density infected | 4  | NA | entomological risk  |

|     |                                                                                 |                          |    |    |                     |
|-----|---------------------------------------------------------------------------------|--------------------------|----|----|---------------------|
| 199 | eri (entomological risk index, average number of infected nymphs per area) lawn | din                      | 14 | NA | entomological risk  |
| 200 | after vs. before deer hunt                                                      | deer hunt                | 5  | NA | host community      |
| 201 | after vs. before percentage residents reporting group size >- 4 deer            | deer hunt                | 5  | NA | host community      |
| 202 | after vs. before percentage residents observing deer daily                      | deer hunt                | 5  | NA | host community      |
| 203 | ixodes scapularis distribution                                                  | tick presence            | 6  | NA | entomological risk  |
| 204 | normalized difference vegetation index                                          | ndvi                     | 2  | NA | land use land cover |
| 205 | blacklegged ticks on property                                                   | tick presence            | 6  | NA | entomological risk  |
| 206 | ground cover including moist humus                                              | compost / litter / cover | 6  | NA | property management |
| 207 | leaf litter                                                                     | compost / litter / cover | 6  | NA | property management |
| 208 | groundhogs                                                                      | groundhogs               | 1  | NA | host community      |
| 209 | warm weather clothing index                                                     | clothing                 | 57 | NA | self-protection     |
| 210 | hiking                                                                          | hiking                   | 10 | NA | activity            |
| 211 | gardening                                                                       | yard work                | 14 | NA | activity            |
| 212 | woodcutting                                                                     | yard work                | 14 | NA | activity            |
| 213 | sunbathing                                                                      | outdoor recreation       | 16 | NA | activity            |
| 214 | bird watching                                                                   | outdoor recreation       | 16 | NA | activity            |

|     |                                            |                  |    |    |                   |
|-----|--------------------------------------------|------------------|----|----|-------------------|
| 215 | horseback riding                           | horse            | 5  | NA | socio-demographic |
| 216 | work and leisure outdoors fall             | activity generic | 8  | NA | activity          |
| 217 | clothing index x no. hours outdoors winter | clothing         | 57 | NA | self-protection   |
| 218 | clothing index x no. hours outdoors spring | clothing         | 57 | NA | self-protection   |
| 219 | clothing index x no. hours outdoors summer | clothing         | 57 | NA | self-protection   |
| 220 | clothing index x no. hours outdoors fall   | clothing         | 57 | NA | self-protection   |
| 221 | clothing index x no. hours outdoors total  | clothing         | 57 | NA | self-protection   |
| 222 | work and leisure outdoors winter           | activity generic | 8  | NA | activity          |
| 223 | work and leisure outdoors spring           | activity generic | 8  | NA | activity          |
| 224 | work and leisure outdoors summer           | activity generic | 8  | NA | activity          |
| 225 | years of residence                         | residence time   | 5  | NA | socio-demographic |
| 226 | work and leisure outdoors total            | activity generic | 8  | NA | activity          |
| 227 | foxes per 1000 hours                       | fox              | 2  | NA | host community    |
| 228 | coyotes per fox                            | coyote           | 2  | NA | host community    |
| 229 | antlered deer harvest per mile squared     | deer             | 12 | NA | host community    |
| 230 | coyote                                     | coyote           | 2  | NA | host community    |
| 231 | fox                                        | fox              | 2  | NA | host community    |
| 232 | deer                                       | deer             | 12 | NA | host community    |

|     |                                                  |                       |    |    |                    |
|-----|--------------------------------------------------|-----------------------|----|----|--------------------|
| 233 | camping $\geq 0$ hours/month vs. 0               | camping               | 7  | NA | activity           |
| 234 | field games $\geq 1$ hours/month vs. 0           | outdoor recreation    | 16 | NA | activity           |
| 235 | fishing $\geq 1$ hours/month vs. 0               | fish / raft           | 7  | NA | activity           |
| 236 | mountain biking $\geq 1$ hours/month vs. 0       | outdoor recreation    | 16 | NA | activity           |
| 237 | road biking $\geq 1$ hours/month vs. 0           | outdoor recreation    | 16 | NA | activity           |
| 238 | deer observed in yard/month $\geq 1$ vs. 0       | deer                  | 12 | NA | host community     |
| 239 | jogging $\geq 1$ hours/month vs. 0               | walk / jog            | 5  | NA | activity           |
| 240 | hiking $\geq 1$ hours/month vs. 0                | hiking                | 10 | NA | activity           |
| 241 | rafting $\geq 1$ hours/month vs. 0               | fish / raft           | 7  | NA | activity           |
| 242 | lizards observed in yard/month $\geq 1$ vs. 0    | lizards               | 1  | NA | host community     |
| 243 | work outdoors yes vs. no                         | occupational exposure | 13 | NA | activity           |
| 244 | trails wilderness hours/wk                       | hiking                | 10 | NA | activity           |
| 245 | read info on lyme disease                        | awareness             | 23 | NA | self-protection    |
| 246 | trails $\geq 2$ ft wide hours/month              | hiking                | 10 | NA | activity           |
| 247 | hours/month spent clearing brush $\geq 1$ vs. 0  | yard work             | 14 | NA | activity           |
| 248 | hours/month spent weeding                        | yard work             | 14 | NA | activity           |
| 249 | remove tick with tweezers by twisting yes vs. no | tick check            | 29 | NA | self-protection    |
| 250 | ticks found on pet                               | ticks on pets         | 2  | NA | entomological risk |
| 251 | check cat for ticks in month yes vs. no          | tick check            | 29 | NA | self-protection    |

|     |                                                         |                    |    |    |                   |
|-----|---------------------------------------------------------|--------------------|----|----|-------------------|
| 252 | remove tick with tweezers by pulling straight yes vs no | tick check         | 29 | NA | self-protection   |
| 253 | wear long pants outside                                 | clothing           | 57 | NA | self-protection   |
| 254 | burn tick with match                                    | tick check         | 29 | NA | self-protection   |
| 255 | pull tick out with fingers                              | tick check         | 29 | NA | self-protection   |
| 256 | contact with domestic animals in month yes vs. no       | pets / animals     | 12 | NA | socio-demographic |
| 257 | contact with a dog in month yes vs. no                  | dog                | 8  | NA | socio-demographic |
| 258 | check dog for ticks in month yes vs. no                 | tick check         | 29 | NA | self-protection   |
| 259 | know lyme disease is in ca                              | awareness          | 23 | NA | self-protection   |
| 260 | contact with a cat in month yes vs. no                  | cat                | 8  | NA | socio-demographic |
| 261 | trails narrow hours/wk                                  | hiking             | 10 | NA | activity          |
| 262 | check for ticks                                         | tick check         | 29 | NA | self-protection   |
| 263 | hours/month spent outdoors (leisure time)               | outdoor recreation | 16 | NA | activity          |
| 264 | hours/month spent on unpaved trails                     | hiking             | 10 | NA | activity          |
| 265 | hours/week spent in yard                                | yard work          | 14 | NA | activity          |
| 266 | use of insect repellent in month yes vs. no             | repellent          | 39 | NA | self-protection   |
| 267 | wear light colors                                       | clothing           | 57 | NA | self-protection   |
| 268 | wears socks tucked in pants 20-100% of time vs. 0-5%    | clothing           | 57 | NA | self-protection   |

|     |                                                           |               |    |    |                     |
|-----|-----------------------------------------------------------|---------------|----|----|---------------------|
| 269 | coniferous                                                | forest        | 55 | NA | land use land cover |
| 270 | herbaceous                                                | herbaceous    | 20 | NA | land use land cover |
| 271 | development                                               | developed     | 43 | NA | land use land cover |
| 272 | forest patch size and forest patch isolation (lyme patch) | forest        | 55 | NA | land use land cover |
| 273 | forest patch size and forest patch isolation (tick patch) | forest        | 55 | NA | land use land cover |
| 274 | ndvi                                                      | ndvi          | 2  | NA | land use land cover |
| 275 | forest cover percent                                      | forest        | 55 | NA | land use land cover |
| 276 | entomological risk index (infected nymphs / minute)       | din           | 14 | NA | entomological risk  |
| 277 | nymphal tick abundance (per minute)                       | din           | 14 | NA | entomological risk  |
| 278 | nymphal tick infection rate with borrelia burgdorferi     | nip           | 3  | NA | entomological risk  |
| 279 | precipitation may june                                    | precipitation | 10 | NA | abiotic             |
| 280 | cumulative gdd above 10 c through week 21                 | temperature   | 21 | NA | abiotic             |
| 281 | mean saturation deficit before onset                      | precipitation | 10 | NA | abiotic             |
| 282 | cumulative precipitation after week 8                     | temperature   | 21 | NA | abiotic             |
| 283 | cumulative gdd above 10 c through week 20                 | temperature   | 21 | NA | abiotic             |



|     |                                         |                      |    |    |                     |
|-----|-----------------------------------------|----------------------|----|----|---------------------|
| 284 | hispanic vs. non-hispanic summer months | hispanic             | 6  | NA | socio-demographic   |
| 285 | hispanic vs. non-hispanic fall months   | hispanic             | 6  | NA | socio-demographic   |
| 286 | nymphal ticks collected per hour        | don                  | 3  | NA | entomological risk  |
| 287 | tick infection rate                     | infection prevalence | 2  | NA | entomological risk  |
| 288 | entomologic risk index                  | din                  | 14 | NA | entomological risk  |
| 289 | percent forested                        | forest               | 55 | NA | land use land cover |
| 290 | clear brush                             | landscape control    | 5  | NA | property management |
| 291 | woodpile                                | wood pile            | 6  | NA | property management |
| 292 | deer damage landscape                   | deer                 | 12 | NA | host community      |
| 293 | deer on property                        | deer                 | 12 | NA | host community      |
| 294 | bird species richness                   | richness             | 5  | NA | host community      |
| 295 | lizard species richness                 | richness             | 5  | NA | host community      |
| 296 | small mammal species richness           | richness             | 5  | NA | host community      |
| 297 | check body                              | tick check           | 29 | NA | self-protection     |
| 298 | avoid ticks                             | avoid ticks          | 6  | NA | self-protection     |
| 299 | any preventive behavior                 | protect generic      | 6  | NA | self-protection     |
| 300 | climate degree days >0                  | temperature          | 21 | NA | abiotic             |

|     |                                            |                       |    |    |                     |
|-----|--------------------------------------------|-----------------------|----|----|---------------------|
| 301 | deciduous forest habitat                   | forest                | 55 | NA | land use land cover |
| 302 | i. scapularis collected per hour (density) | density ticks         | 10 | NA | entomological risk  |
| 303 | inside cat                                 | cat                   | 8  | NA | socio-demographic   |
| 304 | dog                                        | dog                   | 8  | NA | socio-demographic   |
| 305 | outside cat                                | cat                   | 8  | NA | socio-demographic   |
| 306 | horse                                      | horse                 | 5  | NA | socio-demographic   |
| 307 | work exposure: more than half outdoors     | occupational exposure | 13 | NA | activity            |
| 308 | golf                                       | outdoor recreation    | 16 | NA | activity            |
| 309 | work exposure: any outdoors                | occupational exposure | 13 | NA | activity            |
| 310 | winter temp. t-1                           | temperature           | 21 | NA | abiotic             |
| 311 | phdi t-2                                   | hot / dry             | 9  | NA | abiotic             |
| 312 | summer temp t-1                            | temperature           | 21 | NA | abiotic             |
| 313 | summer precip t-1                          | precipitation         | 10 | NA | abiotic             |
| 314 | acorns t-2                                 | acorns                | 6  | NA | host community      |
| 315 | mice t-1                                   | mice                  | 8  | NA | host community      |
| 316 | outdoor work hours                         | occupational exposure | 13 | NA | activity            |
| 317 | ticks noted on pet                         | tick presence         | 6  | NA | entomological risk  |

|     |                                                   |                      |    |    |                     |
|-----|---------------------------------------------------|----------------------|----|----|---------------------|
| 318 | years at residence (>=32 vs. <32)                 | residence time       | 5  | NA | socio-demographic   |
| 319 | deer sightings near residence                     | deer                 | 12 | NA | host community      |
| 320 | fragment perimeters density                       | cover generic        | 9  | NA | land use land cover |
| 321 | percentage of developed                           | developed            | 43 | NA | land use land cover |
| 322 | percentage of forest                              | forest               | 55 | NA | land use land cover |
| 323 | percentage of herbaceous                          | herbaceous           | 20 | NA | land use land cover |
| 324 | fragmented forest area percentage                 | forest               | 55 | NA | land use land cover |
| 325 | contrast-weighted developed-forest edge density   | developed-forest     | 20 | NA | land use land cover |
| 326 | total edge contrast index developed forest        | developed-forest     | 20 | NA | land use land cover |
| 327 | contrast-weighted edge index herbaceous developed | developed-herbaceous | 6  | NA | land use land cover |
| 328 | total edge contrast index herbaceous developed    | developed-herbaceous | 6  | NA | land use land cover |
| 329 | contrast-weighted edge density herbaceous forest  | herbaceous-forest    | 5  | NA | land use land cover |
| 330 | total edge contrast index herbaceous forest       | herbaceous-forest    | 5  | NA | land use land cover |
| 331 | population density                                | pop. density         | 12 | NA | land use land cover |

|     |                                            |            |    |    |                     |
|-----|--------------------------------------------|------------|----|----|---------------------|
| 332 | educational intervention                   | awareness  | 23 | NA | self-protection     |
| 333 | use insect repellent on clothes at work    | repellent  | 39 | NA | self-protection     |
| 334 | use insect repellent on clothes at leisure | repellent  | 39 | NA | self-protection     |
| 335 | tuck pants legs into socks at leisure      | clothing   | 57 | NA | self-protection     |
| 336 | check oneself for ticks at leisure         | tick check | 29 | NA | self-protection     |
| 337 | wear long sleeved shirt at leisure         | clothing   | 57 | NA | self-protection     |
| 338 | wear long pants at work                    | clothing   | 57 | NA | self-protection     |
| 339 | use insect repellent on skin at work       | repellent  | 39 | NA | self-protection     |
| 340 | use insect repellent on skin at leisure    | repellent  | 39 | NA | self-protection     |
| 341 | tuck pants legs into socks at work         | clothing   | 57 | NA | self-protection     |
| 342 | check oneself for ticks at work            | tick check | 29 | NA | self-protection     |
| 343 | wear long-sleeved shirt at work            | clothing   | 57 | NA | self-protection     |
| 344 | wear long pants at leisure                 | clothing   | 57 | NA | self-protection     |
| 345 | wear long sleeved shirt at work            | clothing   | 57 | NA | self-protection     |
| 346 | check for ticks during outdoor activities  | tick check | 29 | NA | self-protection     |
| 347 | check for ticks after outdoor activities   | tick check | 29 | NA | self-protection     |
| 348 | tuck pants legs into socks                 | clothing   | 57 | NA | self-protection     |
| 349 | before activity: use acaricides            | repellent  | 39 | NA | self-protection     |
| 350 | single family home                         | yard size  | 6  | NA | land use land cover |
| 351 | deer damage to landscape                   | deer       | 12 | NA | host community      |

|     |                                                                                |                    |    |    |                     |
|-----|--------------------------------------------------------------------------------|--------------------|----|----|---------------------|
| 352 | mice observed                                                                  | mice               | 8  | NA | host community      |
| 353 | age nearby housing                                                             | age housing        | 2  | NA | land use land cover |
| 354 | yard/land attached to home                                                     | yard size          | 6  | NA | land use land cover |
| 355 | does using woods in or near the yard for recreation or play increase the risk? | time in vegetation | 3  | NA | activity            |
| 356 | leave feed for animals                                                         | feed wildlife      | 10 | NA | property management |
| 357 | ride horses                                                                    | horse              | 5  | NA | socio-demographic   |
| 358 | camp in a tent                                                                 | camping            | 7  | NA | activity            |
| 359 | gardening activity tools                                                       | yard work          | 14 | NA | activity            |
| 360 | frequency of yard work                                                         | yard work          | 14 | NA | activity            |
| 361 | years in home                                                                  | residence time     | 5  | NA | socio-demographic   |
| 362 | visit parks                                                                    | outdoor recreation | 16 | NA | activity            |
| 363 | being a parent                                                                 | parent             | 1  | NA | socio-demographic   |
| 364 | have children who participate in outdoor sports                                | outdoor recreation | 16 | NA | activity            |
| 365 | outdoor recreation                                                             | outdoor recreation | 16 | NA | activity            |
| 366 | walk or jog outdoors                                                           | walk / jog         | 5  | NA | activity            |
| 367 | camp in an rv                                                                  | camping            | 7  | NA | activity            |
| 368 | finding ticks during a search                                                  | tick check         | 29 | NA | self-protection     |

|     |                                                                                                                              |                      |    |    |                     |
|-----|------------------------------------------------------------------------------------------------------------------------------|----------------------|----|----|---------------------|
| 369 | walk or jog in woods                                                                                                         | walk / jog           | 5  | NA | activity            |
| 370 | picnic in parks                                                                                                              | outdoor recreation   | 16 | NA | activity            |
| 371 | picnic outside parks                                                                                                         | outdoor recreation   | 16 | NA | activity            |
| 372 | age of home                                                                                                                  | age housing          | 2  | NA | land use land cover |
| 373 | adult ticks collected per hour                                                                                               | density adults       | 2  | NA | entomological risk  |
| 374 | questing adult ticks (tick bodies) positive for babesia                                                                      | density infected     | 4  | NA | entomological risk  |
| 375 | questing adult ticks (tick bodies) positive for babesia microti                                                              | density infected     | 4  | NA | entomological risk  |
| 376 | percent adult ticks infected with b. burgdorferi                                                                             | infection prevalence | 2  | NA | entomological risk  |
| 377 | eri: product of tick abundance (average number of nymphs per hectare) and the proportion of ticks infected by b. burgdorferi | din                  | 14 | NA | entomological risk  |
| 378 | nymphs/ha                                                                                                                    | don                  | 3  | NA | entomological risk  |
| 379 | proportion of white-footed mice seropositive for b. microti                                                                  | mice                 | 8  | NA | host community      |
| 380 | i. scapularis submitted to htkp                                                                                              | density ticks        | 10 | NA | entomological risk  |
| 381 | b.b. positive i. scapularis collected from deer                                                                              | din                  | 14 | NA | entomological risk  |

|     |                                                                                   |                  |    |    |                        |
|-----|-----------------------------------------------------------------------------------|------------------|----|----|------------------------|
| 382 | ticks collected from small mammals                                                | density ticks    | 10 | NA | entomological<br>risk  |
| 383 | ticks collected from deer                                                         | density ticks    | 10 | NA | entomological<br>risk  |
| 384 | june moisture levels (phdi) t-2                                                   | hot / dry        | 9  | NA | abiotic                |
| 385 | pland24: percentage of land cover of class developed high intensity               | developed        | 43 | NA | land use land<br>cover |
| 386 | lpi24: largest patch index at the landscape level class developed, high intensity | developed        | 43 | NA | land use land<br>cover |
| 387 | tmaxa                                                                             | temperature      | 21 | NA | abiotic                |
| 388 | ed23: class-level edge density for class developed medium intensity               | developed        | 43 | NA | land use land<br>cover |
| 389 | edge21_41                                                                         | developed-forest | 20 | NA | land use land<br>cover |
| 390 | lpi21: largest patch index at the landscape level class developed, open space     | developed        | 43 | NA | land use land<br>cover |
| 391 | te21: total edge at the landscape level class developed, open space               | developed        | 43 | NA | land use land<br>cover |
| 392 | tmaxa: maximum annual temperature                                                 | temperature      | 21 | NA | abiotic                |
| 393 | pland21: percentage of land cover of class developed, open space                  | developed        | 43 | NA | land use land<br>cover |
| 394 | pland42                                                                           | forest           | 55 | NA | land use land<br>cover |
| 395 | ca41                                                                              | forest           | 55 | NA | land use land<br>cover |

|     |                                                                                     |                  |    |    |                     |
|-----|-------------------------------------------------------------------------------------|------------------|----|----|---------------------|
| 396 | pland41                                                                             | forest           | 55 | NA | land use land cover |
| 397 | lpi71                                                                               | herbaceous       | 20 | NA | land use land cover |
| 398 | ed: edge density at the landscape level                                             | cover generic    | 9  | NA | land use land cover |
| 399 | lpi23: largest patch index at the landscape level class developed, medium intensity | developed        | 43 | NA | land use land cover |
| 400 | edge22_41                                                                           | developed-forest | 20 | NA | land use land cover |
| 401 | pland21                                                                             | developed        | 43 | NA | land use land cover |
| 402 | lpi21                                                                               | developed        | 43 | NA | land use land cover |
| 403 | lpi23                                                                               | developed        | 43 | NA | land use land cover |
| 404 | lpi42                                                                               | forest           | 55 | NA | land use land cover |
| 405 | ed21: edge density at the landscape level class developed, open space               | developed        | 43 | NA | land use land cover |
| 406 | pland23: percentage of land cover of class developed, medium intensity              | developed        | 43 | NA | land use land cover |
| 407 | ca43                                                                                | forest           | 55 | NA | land use land cover |
| 408 | lpi41                                                                               | forest           | 55 | NA | land use land cover |



|     |                                                                          |                  |    |    |                     |
|-----|--------------------------------------------------------------------------|------------------|----|----|---------------------|
| 409 | ed41                                                                     | forest           | 55 | NA | land use land cover |
| 410 | lpi41: class-level largest patch index for class deciduous forest        | forest           | 55 | NA | land use land cover |
| 411 | pland41: percentage of land cover of class deciduous forest              | forest           | 55 | NA | land use land cover |
| 412 | ed23                                                                     | developed        | 43 | NA | land use land cover |
| 413 | ed21                                                                     | developed        | 43 | NA | land use land cover |
| 414 | pland24                                                                  | developed        | 43 | NA | land use land cover |
| 415 | edge22_43                                                                | developed-forest | 20 | NA | land use land cover |
| 416 | te41: class-level total edge index for class deciduous forest            | forest           | 55 | NA | land use land cover |
| 417 | te24: class-level total edge index for class developed, high intensity   | developed        | 43 | NA | land use land cover |
| 418 | pland23                                                                  | developed        | 43 | NA | land use land cover |
| 419 | lpi43                                                                    | forest           | 55 | NA | land use land cover |
| 420 | te21                                                                     | developed        | 43 | NA | land use land cover |
| 421 | ed22: edge density at the landscape level class developed, low intensity | developed        | 43 | NA | land use land cover |

|     |                                                                 |                      |    |    |                     |
|-----|-----------------------------------------------------------------|----------------------|----|----|---------------------|
| 422 | ca24: total area of land cover class developed high intensity   | developed            | 43 | NA | land use land cover |
| 423 | te43                                                            | forest               | 55 | NA | land use land cover |
| 424 | ed43                                                            | forest               | 55 | NA | land use land cover |
| 425 | edge21_43                                                       | developed-forest     | 20 | NA | land use land cover |
| 426 | ed41: class-level edge density for class deciduous forest       | forest               | 55 | NA | land use land cover |
| 427 | te41                                                            | forest               | 55 | NA | land use land cover |
| 428 | ratio edge developed medium intensity to grassland & herbaceous | developed-herbaceous | 6  | NA | land use land cover |
| 429 | ratio edge developed medium intensity to mixed forest           | developed-forest     | 20 | NA | land use land cover |
| 430 | total area land cover class developed open space                | developed            | 43 | NA | land use land cover |
| 431 | total area land cover class developed high intensity            | developed            | 43 | NA | land use land cover |
| 432 | total area land cover class deciduous forest                    | forest               | 55 | NA | land use land cover |
| 433 | total area land cover class developed low intensity             | developed            | 43 | NA | land use land cover |
| 434 | total area land cover class developed medium intensity          | developed            | 43 | NA | land use land cover |

|     |                                                              |                      |    |    |                     |
|-----|--------------------------------------------------------------|----------------------|----|----|---------------------|
| 435 | ratio edge developed low intensity to deciduous forest       | developed-forest     | 20 | NA | land use land cover |
| 436 | ratio edge developed low intensity to evergreen forest       | developed-forest     | 20 | NA | land use land cover |
| 437 | ratio edge developed low intensity to mixed forest           | developed-forest     | 20 | NA | land use land cover |
| 438 | ratio edge developed low intensity to grassland & herbaceous | developed-herbaceous | 6  | NA | land use land cover |
| 439 | ratio edge developed medium intensity to deciduous forest    | developed-forest     | 20 | NA | land use land cover |
| 440 | ratio edge developed medium intensity to evergreen forest    | developed-forest     | 20 | NA | land use land cover |
| 441 | edge density deciduous forest                                | forest               | 55 | NA | land use land cover |
| 442 | edge density evergreen forest                                | forest               | 55 | NA | land use land cover |
| 443 | edge density mixed forest                                    | forest               | 55 | NA | land use land cover |
| 444 | edge density grassland & herbaceous                          | herbaceous           | 20 | NA | land use land cover |
| 445 | ratio edge developed open space to deciduous forest          | developed-forest     | 20 | NA | land use land cover |
| 446 | total area land cover class evergreen forest                 | forest               | 55 | NA | land use land cover |
| 447 | percentage developed evergreen forest                        | forest               | 55 | NA | land use land cover |

|     |                                                           |                      |    |    |                     |
|-----|-----------------------------------------------------------|----------------------|----|----|---------------------|
| 448 | ratio edge developed open space to grassland & herbaceous | developed-herbaceous | 6  | NA | land use land cover |
| 449 | total edge grassland & herbaceous                         | herbaceous           | 20 | NA | land use land cover |
| 450 | largest patch index developed low intensity               | developed            | 43 | NA | land use land cover |
| 451 | largest patch index developed medium intensity            | developed            | 43 | NA | land use land cover |
| 452 | largest patch index developed high intensity              | developed            | 43 | NA | land use land cover |
| 453 | largest patch index deciduous forest                      | forest               | 55 | NA | land use land cover |
| 454 | largest patch index evergreen forest                      | forest               | 55 | NA | land use land cover |
| 455 | largest patch index mixed forest                          | forest               | 55 | NA | land use land cover |
| 456 | largest patch index grassland & herbaceous                | herbaceous           | 20 | NA | land use land cover |
| 457 | ratio edge developed high intensity to deciduous forest   | developed-forest     | 20 | NA | land use land cover |
| 458 | ratio edge developed high intensity to evergreen forest   | developed-forest     | 20 | NA | land use land cover |
| 459 | ratio edge developed open space to evergreen forest       | developed-forest     | 20 | NA | land use land cover |
| 460 | ratio edge developed open space to mixed forest           | developed-forest     | 20 | NA | land use land cover |

|     |                                          |               |    |    |                     |
|-----|------------------------------------------|---------------|----|----|---------------------|
| 461 | largest patch index                      | cover generic | 9  | NA | land use land cover |
| 462 | largest patch index developed open space | herbaceous    | 20 | NA | land use land cover |
| 463 | edge density                             | cover generic | 9  | NA | land use land cover |
| 464 | edge density developed open space        | developed     | 43 | NA | land use land cover |
| 465 | edge density developed low intensity     | developed     | 43 | NA | land use land cover |
| 466 | edge density developed medium intensity  | developed     | 43 | NA | land use land cover |
| 467 | edge density developed high intensity    | developed     | 43 | NA | land use land cover |
| 468 | total edge at landscape level            | cover generic | 9  | NA | land use land cover |
| 469 | total edge developed open space          | developed     | 43 | NA | land use land cover |
| 470 | percentage developed open space          | developed     | 43 | NA | land use land cover |
| 471 | percentage developed low intensity       | developed     | 43 | NA | land use land cover |
| 472 | percentage developed medium intensity    | developed     | 43 | NA | land use land cover |
| 473 | percentage developed high intensity      | developed     | 43 | NA | land use land cover |

|     |                                                      |               |    |    |                     |
|-----|------------------------------------------------------|---------------|----|----|---------------------|
| 474 | total area land cover class mixed forest             | forest        | 55 | NA | land use land cover |
| 475 | total area land cover class grassland and herbaceous | herbaceous    | 20 | NA | land use land cover |
| 476 | percentage developed deciduous forest                | forest        | 55 | NA | land use land cover |
| 477 | percentage developed mixed forest                    | forest        | 55 | NA | land use land cover |
| 478 | percentage developed grassland & herbaceous          | herbaceous    | 20 | NA | land use land cover |
| 479 | precipitation                                        | precipitation | 10 | NA | abiotic             |
| 480 | maximum annual temperature                           | temperature   | 21 | NA | abiotic             |
| 481 | total area at landscape level                        | cover generic | 9  | NA | land use land cover |
| 482 | total edge deciduous forest                          | forest        | 55 | NA | land use land cover |
| 483 | total edge developed low intensity                   | developed     | 43 | NA | land use land cover |
| 484 | total edge developed medium intensity                | developed     | 43 | NA | land use land cover |
| 485 | total edge developed high intensity                  | developed     | 43 | NA | land use land cover |
| 486 | total edge evergreen forest                          | forest        | 55 | NA | land use land cover |
| 487 | total edge mixed forest                              | forest        | 55 | NA | land use land cover |

|     |                                                                                                                         |                       |    |    |                     |
|-----|-------------------------------------------------------------------------------------------------------------------------|-----------------------|----|----|---------------------|
| 488 | ratio edge developed high intensity to mixed forest                                                                     | developed-forest      | 20 | NA | land use land cover |
| 489 | ratio edge developed high intensity to grassland & herbaceous                                                           | developed-herbaceous  | 6  | NA | land use land cover |
| 490 | host species richness                                                                                                   | richness              | 5  | NA | host community      |
| 491 | forest area                                                                                                             | forest                | 55 | NA | land use land cover |
| 492 | have any pets at home                                                                                                   | pets / animals        | 12 | NA | socio-demographic   |
| 493 | living close to grassy or heavily wooded area                                                                           | herbaceous-forest     | 5  | NA | land use land cover |
| 494 | routinely check for ticks on the body after being outdoors?                                                             | tick check            | 29 | NA | self-protection     |
| 495 | having an occupational exposure                                                                                         | occupational exposure | 13 | NA | activity            |
| 496 | wear clothing to protect against ticks while outdoors, e.g., long pants, long-sleeved shirts, or light-colored clothing | clothing              | 57 | NA | self-protection     |
| 497 | routinely use tick repellents on the skin and/or clothing while outdoors                                                | repellent             | 39 | NA | self-protection     |
| 498 | engage in outdoor activities that put you at higher risk for tick bites (such as hiking, camping, gardening, hunting)   | outdoor recreation    | 16 | NA | activity            |
| 499 | entomologic risk index (total number of ticks × proportion of ticks infected )                                          | density infected      | 4  | NA | entomological risk  |

|     |                                                    |                    |    |    |                     |
|-----|----------------------------------------------------|--------------------|----|----|---------------------|
| 500 | ever seen ticks on pet                             | ticks on pets      | 2  | NA | entomological risk  |
| 501 | hiking or camping                                  | outdoor recreation | 16 | NA | activity            |
| 502 | forest patch area                                  | forest             | 55 | NA | land use land cover |
| 503 | average forest patch perimeter                     | forest             | 55 | NA | land use land cover |
| 504 | forest density                                     | forest             | 55 | NA | land use land cover |
| 505 | perimeter between forested land and developed land | developed-forest   | 20 | NA | land use land cover |
| 506 | forested land                                      | forest             | 55 | NA | land use land cover |
| 507 | surface water area                                 | water              | 6  | NA | land use land cover |
| 508 | percent developed land                             | developed          | 43 | NA | land use land cover |
| 509 | largest forest patch area                          | forest             | 55 | NA | land use land cover |
| 510 | dependence of persistence on proximity to water    | water              | 6  | NA | land use land cover |
| 511 | dependence of colonization on proximity to water   | water              | 6  | NA | land use land cover |
| 512 | dependence of recolonization on proximity to water | water              | 6  | NA | land use land cover |
| 513 | dependence of recolonization on tick density       | density ticks      | 10 | NA | entomological risk  |



|     |                                                        |               |    |    |                     |
|-----|--------------------------------------------------------|---------------|----|----|---------------------|
| 514 | dependence of persistence on tick density              | density ticks | 10 | NA | entomological risk  |
| 515 | deer vehicle accidents                                 | deer          | 12 | NA | host community      |
| 516 | sex male vs sex female                                 | female        | 4  | 1  | socio-demographic   |
| 517 | sex male vs. female                                    | female        | 4  | 1  | socio-demographic   |
| 518 | rural vs. non-rural                                    | pop. density  | 12 | 1  | land use land cover |
| 519 | male vs. female                                        | female        | 4  | 1  | socio-demographic   |
| 520 | distance from coast (km)                               | coast         | 3  | 1  | land use land cover |
| 521 | age 0 to 9 vs age                                      | age           | 8  | NA | socio-demographic   |
| 522 | age 40 to 49 vs age                                    | age           | 8  | NA | socio-demographic   |
| 523 | age 60 to 100 vs age                                   | age           | 8  | NA | socio-demographic   |
| 524 | age 1 to 4 vs age                                      | age           | 8  | NA | socio-demographic   |
| 525 | age 40 to 44 vs age                                    | age           | 8  | NA | socio-demographic   |
| 526 | median time (h/week) hiking off trails in wooded areas | hiking        | 10 | NA | activity            |
| 527 | median time (h/week) hiking on trails in wooded areas  | hiking        | 10 | NA | activity            |

|     |                                              |                    |    |    |                     |
|-----|----------------------------------------------|--------------------|----|----|---------------------|
| 528 | median time (h/week) in outdoor recreation   | outdoor recreation | 16 | NA | activity            |
| 529 | wear light-colored clothing                  | clothing           | 57 | NA | self-protection     |
| 530 | check clothes for ticks                      | tick check         | 29 | NA | self-protection     |
| 531 | check body for ticks                         | tick check         | 29 | NA | self-protection     |
| 532 | apply repellent to skin                      | repellent          | 39 | NA | self-protection     |
| 533 | apply repellent to clothing                  | repellent          | 39 | NA | self-protection     |
| 534 | age less than 16 years                       | age                | 8  | NA | socio-demographic   |
| 535 | own dog(s)                                   | dog                | 8  | NA | socio-demographic   |
| 536 | deer-exclusion fence                         | fence              | 7  | NA | property management |
| 537 | property >= 6.07 hectares                    | yard size          | 6  | NA | land use land cover |
| 538 | own horse(s)                                 | horse              | 5  | NA | socio-demographic   |
| 539 | number of precautions known                  | awareness          | 23 | NA | self-protection     |
| 540 | wear long-sleeved shirt today -- heard about | clothing           | 57 | NA | self-protection     |
| 541 | wear long-sleeved shirt today                | clothing           | 57 | NA | self-protection     |
| 542 | tick control for dog                         | repellent          | 39 | NA | self-protection     |
| 543 | educational intervention vs. comparator      | awareness          | 23 | NA | self-protection     |
| 544 | hours in your yard                           | yard work          | 14 | NA | activity            |
| 545 | hours in other outdoor places                | activity generic   | 8  | NA | activity            |

|     |                                       |                  |    |    |                     |
|-----|---------------------------------------|------------------|----|----|---------------------|
| 546 | indoor-outdoor pets                   | pets / animals   | 12 | NA | socio-demographic   |
| 547 | property size>1 but less than 2 acres | yard size        | 6  | NA | land use land cover |
| 548 | stone wall                            | stone wall       | 7  | NA | property management |
| 549 | bathed or showered                    | bathe            | 3  | NA | self-protection     |
| 550 | hours in someone else's yard          | yard work        | 14 | NA | activity            |
| 551 | birdfeeder in yard                    | feed wildlife    | 10 | NA | property management |
| 552 | outdoor dining area                   | activity area    | 13 | NA | property management |
| 553 | property more than half woods         | forest           | 55 | NA | land use land cover |
| 554 | frequency of deer sighting            | deer             | 12 | NA | host community      |
| 555 | frequency of outdoor activities       | activity generic | 8  | NA | activity            |
| 556 | age (mean)                            | age              | 8  | NA | socio-demographic   |
| 557 | house lot size                        | yard size        | 6  | NA | land use land cover |
| 558 | pet owner                             | pets / animals   | 12 | NA | socio-demographic   |
| 559 | insect repellent on skin sometimes    | repellent        | 39 | NA | self-protection     |
| 560 | insect repellent use on skin always   | repellent        | 39 | NA | self-protection     |
| 561 | insect repellent use on skin usually  | repellent        | 39 | NA | self-protection     |

## Web Table 2.

### Citation Information for Articles Used in Quantitative Meta-Analysis

| Authors                 | Year | Title                                                                                                                                                                    | Journal                                       | Page Nos. |
|-------------------------|------|--------------------------------------------------------------------------------------------------------------------------------------------------------------------------|-----------------------------------------------|-----------|
| <b>Bowen</b>            | 1984 | A Focus of Lyme diseases in Monmouth County, New Jersey                                                                                                                  | AMERICAN JOURNAL OF<br>EPIDEMIOLOGY           |           |
| <b>PF SMITH</b>         | 1988 | OCCUPATIONAL RISK OF LYME-DISEASE IN ENDEMIC<br>AREAS OF NEW-YORK STATE                                                                                                  | ANNALS OF THE NEW YORK<br>ACADEMY OF SCIENCES | 289-301   |
| <b>BS<br/>SCHWARTZ</b>  | 1990 | LYME-DISEASE IN OUTDOOR WORKERS - RISK-FACTORS,<br>PREVENTIVE MEASURES, AND TICK REMOVAL METHODS                                                                         | AMERICAN JOURNAL OF<br>EPIDEMIOLOGY           | 877-885   |
| <b>MD<br/>GOLDSTEIN</b> | 1990 | LYME-DISEASE IN NEW-JERSEY OUTDOOR WORKERS - A<br>STATEWIDE SURVEY OF SEROPREVALENCE AND TICK<br>EXPOSURE                                                                | AMERICAN JOURNAL OF PUBLIC<br>HEALTH          | 1225-1229 |
| <b>BS<br/>SCHWARTZ</b>  | 1991 | ANTITICK SALIVA ANTIBODY - A BIOLOGIC MARKER OF<br>TICK EXPOSURE THAT IS A RISK FACTOR FOR LIME<br>DISEASE SEROPOSITIVITY                                                | AMERICAN JOURNAL OF<br>EPIDEMIOLOGY           | 86-95     |
| <b>B ALPERT</b>         | 1992 | INCIDENCE AND PREVALENCE OF LYME-DISEASE IN A<br>SUBURBAN WESTCHESTER COUNTY COMMUNITY                                                                                   | NEW YORK STATE JOURNAL OF<br>MEDICINE         | 8-May     |
| <b>MM HUYCKE</b>        | 1992 | PREVALENCE OF ANTIBODY TO BORRELIA-BURGDORFERI<br>BY INDIRECT FLUORESCENT-ANTIBODY ASSAY, ELISA,<br>AND WESTERN IMMUNOBLOT IN HEALTHY-ADULTS IN<br>WISCONSIN AND ARIZONA | JOURNAL OF INFECTIOUS DISEASES                | 1133-1137 |
| <b>RS LANE</b>          | 1992 | RISK-FACTORS FOR LYME-DISEASE IN A SMALL RURAL-<br>COMMUNITY IN NORTHERN CALIFORNIA                                                                                      | AMERICAN JOURNAL OF<br>EPIDEMIOLOGY           | 1358-1368 |
| <b>BS<br/>SCHWARTZ</b>  | 1994 | LONGITUDINAL-STUDY OF BORRELIA-BURGDORFERI<br>INFECTION IN NEW-JERSEY OUTDOOR WORKERS, 1988-<br>1991                                                                     | AMERICAN JOURNAL OF<br>EPIDEMIOLOGY           | 504-512   |

|                     |      |                                                                                                          |                                                   |           |
|---------------------|------|----------------------------------------------------------------------------------------------------------|---------------------------------------------------|-----------|
| <b>C LEY</b>        | 1995 | CASE-CONTROL STUDY OF RISK-FACTORS FOR INCIDENT LYME-DISEASE IN CALIFORNIA                               | AMERICAN JOURNAL OF EPIDEMIOLOGY                  | S39-S47   |
| <b>GE GLASS</b>     | 1995 | ENVIRONMENTAL RISK-FACTORS FOR LYME-DISEASE IDENTIFIED WITH GEOGRAPHIC INFORMATION-SYSTEMS               | AMERICAN JOURNAL OF PUBLIC HEALTH                 | 944-948   |
| <b>GL CAMPBELL</b>  | 1995 | EPIDEMIOLOGIC AND DIAGNOSTIC STUDIES OF PATIENTS WITH SUSPECTED EARLY LYME-DISEASE, MISSOURI, 1990-1993  | JOURNAL OF INFECTIOUS DISEASES                    | 470-480   |
| <b>W HALLMAN</b>    | 1995 | PRECAUTIONS TAKEN AGAINST LYME-DISEASE AT 3 RECREATIONAL PARKS IN ENDEMIC AREAS OF NEW-JERSEY            | ENVIRONMENT AND BEHAVIOR                          | 437-453   |
| <b>JD Klein</b>     | 1996 | Environmental and life-style risk factors for lyme disease in children                                   | CLINICAL PEDIATRICS                               | 359-363   |
| <b>MC Nicholson</b> | 1996 | Methods for evaluating lyme disease risks using geographic information systems and geospatial analysis   | JOURNAL OF MEDICAL ENTOMOLOGY                     | 711-720   |
| <b>PW Rand</b>      | 1996 | Low seroprevalence of human Lyme disease near a focus of high entomologic risk                           | AMERICAN JOURNAL OF TROPICAL MEDICINE AND HYGIENE | 160-164   |
| <b>RC Falco</b>     | 1996 | Duration of tick bites in a Lyme disease-endemic area                                                    | AMERICAN JOURNAL OF EPIDEMIOLOGY                  | 187-192   |
| <b>TN Mather</b>    | 1996 | Entomologic index for human risk of Lyme disease                                                         | AMERICAN JOURNAL OF EPIDEMIOLOGY                  | 1066-1069 |
| <b>CL Fritz</b>     | 1997 | Seroepidemiology of emerging tickborne infectious diseases in a northern California community            | JOURNAL OF INFECTIOUS DISEASES                    | 1432-1439 |
| <b>U Kitron</b>     | 1997 | Spatial analysis of the distribution of Lyme disease in Wisconsin                                        | AMERICAN JOURNAL OF EPIDEMIOLOGY                  | 558-566   |
| <b>BJ Wallace</b>   | 1998 | Human granulocytic ehrlichiosis in New York                                                              | ARCHIVES OF INTERNAL MEDICINE                     | 769-773   |
| <b>DJ White</b>     | 1998 | Human babesiosis in New York State - Review of 139 hospitalized cases and analysis of prognostic factors | ARCHIVES OF INTERNAL MEDICINE                     | 2149-2154 |

|                    |      |                                                                                                                                                                       |                                                   |           |
|--------------------|------|-----------------------------------------------------------------------------------------------------------------------------------------------------------------------|---------------------------------------------------|-----------|
| <b>EK Cromley</b>  | 1998 | Residential setting as a risk factor for Lyme disease in a hyperendemic region                                                                                        | AMERICAN JOURNAL OF EPIDEMIOLOGY                  | 472-477   |
| <b>KA Orloski</b>  | 1998 | Emergence of Lyme disease in Hunterdon County, New Jersey, 1993: A case-control study of risk factors and evaluation of reporting patterns                            | AMERICAN JOURNAL OF EPIDEMIOLOGY                  | 391-397   |
| <b>KC Stafford</b> | 1998 | Temporal correlations between tick abundance and prevalence of ticks infected with <i>Borrelia burgdorferi</i> and increasing incidence of Lyme disease               | JOURNAL OF CLINICAL MICROBIOLOGY                  | 1240-1244 |
| <b>TJ Daniels</b>  | 1998 | Geographic risk for Lyme disease and human granulocytic ehrlichiosis in southern New York state                                                                       | APPLIED AND ENVIRONMENTAL MICROBIOLOGY            | 4663-4669 |
| <b>EA Belongia</b> | 1999 | Clinical and epidemiological features of early Lyme disease and human granulocytic ehrlichiosis in Wisconsin                                                          | CLINICAL INFECTIOUS DISEASES                      | 1472-1477 |
| <b>ME Ryan</b>     | 1999 | Prevalence of antibody to <i>Borrelia burgdorferi</i> in an outpatient setting in central and northeastern Pennsylvania                                               | INFECTIOUS DISEASES IN CLINICAL PRACTICE          | 341-345   |
| <b>ML Sanders</b>  | 1999 | Antibody levels to recombinant tick calreticulin increase in humans after exposure to <i>Ixodes scapularis</i> (say) and are correlated with tick engorgement indices | AMERICAN JOURNAL OF EPIDEMIOLOGY                  | 777-784   |
| <b>RC Falco</b>    | 1999 | Temporal relation between <i>Ixodes scapularis</i> abundance and risk for Lyme disease associated with erythema migrans                                               | AMERICAN JOURNAL OF EPIDEMIOLOGY                  | 771-776   |
| <b>RS Lane</b>     | 1999 | Anti-arthropod saliva antibodies among residents of a community at high risk for Lyme disease in California                                                           | AMERICAN JOURNAL OF TROPICAL MEDICINE AND HYGIENE | 850-859   |
| <b>RS Ostfeld</b>  | 2000 | Biodiversity and disease risk: The case of lyme disease                                                                                                               | CONSERVATION BIOLOGY                              | 722-728   |
| <b>CB Phillips</b> | 2001 | Lyme disease and preventive behaviors in residents of Nantucket Island, Massachusetts                                                                                 | AMERICAN JOURNAL OF PREVENTIVE MEDICINE           | 219-224   |
| <b>EA Belongia</b> | 2001 | Tickborne infections as a cause of nonspecific febrile illness in Wisconsin                                                                                           | CLINICAL INFECTIOUS DISEASES                      | 1434-1439 |
| <b>G Smith</b>     | 2001 | Risk factors for Lyme disease in Chester County, Pennsylvania                                                                                                         | PUBLIC HEALTH REPORTS                             | 146-156   |

|                          |      |                                                                                                                                                              |                                                   |           |
|--------------------------|------|--------------------------------------------------------------------------------------------------------------------------------------------------------------|---------------------------------------------------|-----------|
| <b>CC Chow</b>           | 2003 | Lyme disease trends - Dutchess County, New York, 1992-2000                                                                                                   | MOUNT SINAI JOURNAL OF MEDICINE                   | 207-213   |
| <b>R Malouin</b>         | 2003 | Longitudinal evaluation of an educational intervention for preventing tick bites in an area with endemic Lyme disease in Baltimore County, Maryland          | AMERICAN JOURNAL OF EPIDEMIOLOGY                  | 1039-1051 |
| <b>S Subak</b>           | 2003 | Effects of climate on variability in Lyme disease incidence in the northeastern United States                                                                | AMERICAN JOURNAL OF EPIDEMIOLOGY                  | 531-538   |
| <b>Townsend</b>          | 2003 | The effects of bird feeders on Lyme disease prevalence and density of Ixodes scapularis (Acari: Ixodidae) in a residential area of Dutchess County, New York | JOURNAL OF MEDICAL ENTOMOLOGY                     |           |
| <b>GJ McCabe</b>         | 2004 | Precipitation and the occurrence of Lyme disease in the northeastern United States                                                                           | VECTOR-BORNE AND ZOONOTIC DISEASES                | 143-148   |
| <b>EM Schaubert</b>      | 2005 | What is the best predictor of annual Lyme disease incidence: Weather, mice, or acorns?                                                                       | ECOLOGICAL APPLICATIONS                           | 575-586   |
| <b>JS Brownstein</b>     | 2005 | Forest fragmentation predicts local scale heterogeneity of Lyme disease risk                                                                                 | OECOLOGIA                                         | 469-475   |
| <b>LJ Demma</b>          | 2005 | Epidemiology of human ehrlichiosis and anaplasmosis in the United States, 2001-2002                                                                          | AMERICAN JOURNAL OF TROPICAL MEDICINE AND HYGIENE | 400-409   |
| <b>L. E. Jackson</b>     | 2006 | A comparison of analysis units for associating Lyme disease with forest-edge habitat                                                                         | COMMUNITY ECOLOGY                                 | 189-197   |
| <b>LE Jackson</b>        | 2006 | Towards landscape design guidelines for reducing Lyme disease risk                                                                                           | INTERNATIONAL JOURNAL OF EPIDEMIOLOGY             | 315-322   |
| <b>Neeta P. Connally</b> | 2006 | Assessing peridomestic entomological factors as predictors for Lyme disease                                                                                  | JOURNAL OF VECTOR ECOLOGY                         | 364-370   |
| <b>Lawren H. Daltroy</b> | 2007 | A controlled trial of a novel primary prevention program for Lyme disease and other tick-borne illnesses                                                     | HEALTH EDUCATION & BEHAVIOR                       | 531-542   |
| <b>Peter W. Rand</b>     | 2007 | Passive surveillance in Maine, an area emergent for tick-borne diseases                                                                                      | JOURNAL OF MEDICAL ENTOMOLOGY                     | 1118-1129 |

|                            |      |                                                                                                                                                           |                                                   |           |
|----------------------------|------|-----------------------------------------------------------------------------------------------------------------------------------------------------------|---------------------------------------------------|-----------|
| <b>Robert A. Jordan</b>    | 2007 | Effects of reduced deer density on the abundance of Ixodes scapularis (Acari : ixodidae) and Lyme disease incidence in a northern new jersey endemic area | JOURNAL OF MEDICAL ENTOMOLOGY                     | 752-757   |
| <b>Sarah E. Rodgers</b>    | 2007 | Human Babesia microti incidence and Ixodes scapularis distribution, Rhode Island, 1998-2004                                                               | EMERGING INFECTIOUS DISEASES                      | 633-635   |
| <b>J. Stone Doggett</b>    | 2008 | Lyme disease in Oregon                                                                                                                                    | JOURNAL OF CLINICAL MICROBIOLOGY                  | 2115-2118 |
| <b>Marietta Vazquez</b>    | 2008 | Effectiveness of personal protective measures to prevent Lyme disease                                                                                     | EMERGING INFECTIOUS DISEASES                      | 210-216   |
| <b>Paul C. F. Graf</b>     | 2008 | Prevalence of seropositivity to spotted fever group rickettsiae and Anaplasma phagocytophilum in a large, demographically diverse US sample               | CLINICAL INFECTIOUS DISEASES                      | 70-77     |
| <b>Neeta P. Connally</b>   | 2009 | Peridomestic Lyme Disease Prevention Results of a Population-Based Case-Control Study                                                                     | AMERICAN JOURNAL OF PREVENTIVE MEDICINE           | 201-206   |
| <b>Seth T. Walk</b>        | 2009 | Correlation between Tick Density and Pathogen Endemicity, New Hampshire                                                                                   | EMERGING INFECTIOUS DISEASES                      | 585-587   |
| <b>F. Scott Dahlgren</b>   | 2011 | Increasing Incidence of Ehrlichia chaffeensis and Anaplasma phagocytophilum in the United States, 2000-2007                                               | AMERICAN JOURNAL OF TROPICAL MEDICINE AND HYGIENE | 124-131   |
| <b>Jennifer M. Garnett</b> | 2011 | Student Column EVALUATION OF DEER-TARGETED INTERVENTIONS ON LYME DISEASE INCIDENCE IN CONNECTICUT                                                         | PUBLIC HEALTH REPORTS                             | 446-454   |
| <b>Meagan F. Vaughn</b>    | 2011 | Pilot Study Assessing the Effectiveness of Long-Lasting Permethrin-Impregnated Clothing for the Prevention of Tick Bites                                  | VECTOR-BORNE AND ZOOLOGICAL DISEASES              | 869-875   |
| <b>Arianne M. Folkema</b>  | 2012 | Epidemiology of Ehrlichiosis and Anaplasmosis among American Indians in the United States, 2000-2007                                                      | AMERICAN JOURNAL OF TROPICAL MEDICINE AND HYGIENE | 529-537   |



|                             |      |                                                                                                                                                                                                                                                   |                                                                                 |             |
|-----------------------------|------|---------------------------------------------------------------------------------------------------------------------------------------------------------------------------------------------------------------------------------------------------|---------------------------------------------------------------------------------|-------------|
| <b>Elizabeth D. Hilborn</b> | 2012 | Repeated holdout cross-validation of model to estimate risk of Lyme disease by landscape characteristics                                                                                                                                          | INTERNATIONAL JOURNAL OF ENVIRONMENTAL HEALTH RESEARCH                          | 11-Jan      |
| <b>Mikhail Menis</b>        | 2012 | Babesiosis among Elderly Medicare Beneficiaries, United States, 2006-2008                                                                                                                                                                         | EMERGING INFECTIOUS DISEASES                                                    | 128-131     |
| <b>Starr-Hope Ertel</b>     | 2012 | Effect of Surveillance Method on Reported Characteristics of Lyme Disease, Connecticut, 1996-2007                                                                                                                                                 | EMERGING INFECTIOUS DISEASES                                                    | 242-247     |
| <b>Taal Levi</b>            | 2012 | Deer, predators, and the emergence of Lyme disease                                                                                                                                                                                                | PROCEEDINGS OF THE NATIONAL ACADEMY OF SCIENCES OF THE UNITED STATES OF AMERICA | 10942-10947 |
| <b>Daniel H. Wiznia</b>     | 2013 | The Use of Deer Vehicle Accidents as a Proxy for Measuring the Degree of Interaction Between Human and Deer Populations and Its Correlation With the Incidence Rate of Lyme Disease                                                               | JOURNAL OF ENVIRONMENTAL HEALTH                                                 | 32-39       |
| <b>Michael G. Walsh</b>     | 2013 | The Relevance of Forest Fragmentation on the Incidence of Human Babesiosis: Investigating the Landscape Epidemiology of an Emerging Tick-Borne Disease                                                                                            | VECTOR-BORNE AND ZOONOTIC DISEASES                                              | 250-255     |
| <b>Phoebe Minh Tran</b>     | 2013 | Effects of Landscape Fragmentation and Climate on Lyme Disease Incidence in the Northeastern United States                                                                                                                                        | ECOHEALTH                                                                       | 394-404     |
| <b>Alyson Lorenz</b>        | 2014 | Inter-Model Comparison of the Landscape Determinants of Vector-Borne Disease: Implications for Epidemiological and Entomological Risk Modeling                                                                                                    | PLOS ONE                                                                        | NA          |
| <b>Casey Finch</b>          | 2014 | Integrated Assessment of Behavioral and Environmental Risk Factors for Lyme Disease Infection on Block Island, Rhode Island                                                                                                                       | PLOS ONE                                                                        | NA          |
| <b>Ellen Stromdahl</b>      | 2014 | Comparison of phenology and pathogen prevalence, including infection with the Ehrlichia muris-like (EML) agent, of Ixodes scapularis removed from soldiers in the midwestern and the northeastern United States over a 15 year period (1997-2012) | PARASITES & VECTORS                                                             | NA          |
| <b>Howard J. Kilpatrick</b> | 2014 | The Relationship Between Deer Density, Tick Abundance, and Human Cases of Lyme Disease in a Residential Community                                                                                                                                 | JOURNAL OF MEDICAL ENTOMOLOGY                                                   | 777-784     |

|                              |      |                                                                                                                        |                                                   |           |
|------------------------------|------|------------------------------------------------------------------------------------------------------------------------|---------------------------------------------------|-----------|
| <b>Kirby C. Stafford III</b> | 2014 | Expansion of Zoonotic Babesiosis and Reported Human Cases, Connecticut, 2001-2010                                      | JOURNAL OF MEDICAL ENTOMOLOGY                     | 245-252   |
| <b>Maria A. Diuk-Wasser</b>  | 2014 | Monitoring Human Babesiosis Emergence through Vector Surveillance, New England, USA                                    | EMERGING INFECTIOUS DISEASES                      | 225-231   |
| <b>R. Jory Brinkerhoff</b>   | 2014 | Lyme Disease, Virginia, USA, 2000-2011                                                                                 | EMERGING INFECTIOUS DISEASES                      | 1661-1668 |
| <b>Robert P. Smith Jr.</b>   | 2014 | Human Babesiosis, Maine, USA, 1995-2011                                                                                | EMERGING INFECTIOUS DISEASES                      | 1727-1730 |
| <b>Sean M. Moore</b>         | 2014 | Meteorological Influences on the Seasonality of Lyme Disease in the United States                                      | AMERICAN JOURNAL OF TROPICAL MEDICINE AND HYGIENE | 486-496   |
| <b>Turney</b>                | 2014 | The negative relationship between mammal host diversity and Lyme disease incidence strengthens through time            | ECOLOGY                                           | 3244-3250 |
| <b>Joseph D. Forrester</b>   | 2015 | Epidemiology of Lyme disease in low-incidence states                                                                   | TICKS AND TICK-BORNE DISEASES                     | 721-723   |
| <b>Mikhail Menis</b>         | 2015 | Babesiosis Occurrence among the Elderly in the United States, as Recorded in Large Medicare Databases during 2006-2013 | PLOS ONE                                          | NA        |
| <b>Sara E. Seukep</b>        | 2015 | An Examination of the Demographic and Environmental Variables Correlated with Lyme Disease Emergence in Virginia       | ECOHEALTH                                         | 634-644   |
| <b>Sharon K. Greene</b>      | 2015 | Disparities in Reportable Communicable Disease Incidence by Census Tract-Level Poverty, New York City, 2006-2013       | AMERICAN JOURNAL OF PUBLIC HEALTH                 | E27-E34   |
| <b>Stacie J. Robinson</b>    | 2015 | Disease Risk in a Dynamic Environment: The Spread of Tick-Borne Pathogens in Minnesota, USA                            | ECOHEALTH                                         | 152-163   |
| <b>Alison F. Hinckley</b>    | 2016 | Effectiveness of Residential Acaricides to Prevent Lyme and Other Tick-borne Diseases in Humans                        | JOURNAL OF INFECTIOUS DISEASES                    | 182-188   |
| <b>Amber D. Butler</b>       | 2016 | Tick-borne disease preventive practices and perceptions in an endemic area                                             | TICKS AND TICK-BORNE DISEASES                     | 331-337   |

|                            |      |                                                                                                                                                |                                                                                 |                 |
|----------------------------|------|------------------------------------------------------------------------------------------------------------------------------------------------|---------------------------------------------------------------------------------|-----------------|
| <b>Christina A. Nelson</b> | 2016 | Lyme Disease in Hispanics, United States, 2000-2013                                                                                            | EMERGING INFECTIOUS DISEASES                                                    | 522-525         |
| <b>Guang Xu</b>            | 2016 | Passive Surveillance of Ixodes scapularis (Say), Their Biting Activity, and Associated Pathogens in Massachusetts                              | VECTOR-BORNE AND ZOONOTIC DISEASES                                              | 520-527         |
| <b>James C. Burtis</b>     | 2016 | The impact of temperature and precipitation on blacklegged tick activity and Lyme disease incidence in endemic and emerging regions            | PARASITES & VECTORS                                                             | NA              |
| <b>Jeremy M. Cohen</b>     | 2016 | Spatial scale modulates the strength of ecological processes driving disease distributions                                                     | PROCEEDINGS OF THE NATIONAL ACADEMY OF SCIENCES OF THE UNITED STATES OF AMERICA | E3359-<br>E3364 |
| <b>Katharine S. Walter</b> | 2016 | Invasion of two tick-borne diseases across New England: harnessing human surveillance data to capture underlying ecological invasion processes | PROCEEDINGS OF THE ROYAL SOCIETY B-BIOLOGICAL SCIENCES                          | NA              |
| <b>Nancy A. Shadick</b>    | 2016 | A School-Based Intervention to Increase Lyme Disease Preventive Measures Among Elementary School-Aged Children                                 | VECTOR-BORNE AND ZOONOTIC DISEASES                                              | 507-515         |
| <b>Phoebe Tran</b>         | 2016 | Validating negative binomial lyme disease regression model with bootstrap resampling                                                           | ENVIRONMENTAL MODELLING & SOFTWARE                                              | 121-127         |
| <b>Salima Gasm</b>         | 2016 | Analysis of the human population bitten by Ixodes scapularis ticks in Quebec, Canada: Increasing risk of Lyme disease                          | TICKS AND TICK-BORNE DISEASES                                                   | 1075-1081       |
| <b>Aenishaenslin</b>       | 2017 | Exposure and preventive behaviours toward ticks and Lyme disease in Canada: Results from a first national survey                               | TICKS AND TICK-BORNE DISEASES                                                   | 112-118         |
| <b>E. H. Jones</b>         | 2018 | Pet ownership increases human risk of encountering ticks                                                                                       | ZOOSES AND PUBLIC HEALTH                                                        | 74-79           |
| <b>Mead</b>                | 2018 | Risk factors for tick exposure in suburban settings in the Northeastern United States                                                          | TICKS AND TICK-BORNE DISEASES                                                   | 319-324         |

### Web Table 3.

Odds Ratios and Confidence Intervals for Variables Measured in Relation to Tick Bites and Disease

*P* values were computed, using a linear model, for variables with at least two observations.

| variable.recategorized | Odds.ratio | CI.upper | CI.lower | <i>P</i> | DF | <i>t</i> | disease.or.bite | Category            | N.observations | N.studies | P Value Significance | CI Excludes 1 |
|------------------------|------------|----------|----------|----------|----|----------|-----------------|---------------------|----------------|-----------|----------------------|---------------|
| not activity generic   | 1.009      | 1.103    | 0.915    | 0.7162   | 1  | 0.478    | bite            | activity            | 2              | 2         |                      |               |
| hiking                 | 1.077      | 1.734    | 0.669    | NA       | NA | NA       | bite            | activity            | 1              | 1         |                      |               |
| outdoor recreation     | 1.32       | 1.664    | 1.046    | NA       | NA | NA       | bite            | activity            | 1              | 1         |                      | *             |
| hunting                | 1.327      | 2.114    | 0.833    | NA       | NA | NA       | bite            | activity            | 1              | 1         |                      |               |
| yard work              | 1.164      | 1.663    | 0.815    | NA       | NA | NA       | bite            | activity            | 1              | 1         |                      |               |
| tick presence          | 2.599      | 4.317    | 1.564    | NA       | NA | NA       | bite            | entomological risk  | 1              | 1         |                      | *             |
| not deer               | 1.082      | 1.329    | 0.88     | NA       | NA | NA       | bite            | host community      | 1              | 1         |                      |               |
| land use               | 3.275      | 4.253    | 2.297    | 0.2107   | 2  | 1.818    | bite            | land measure type   | 3              | 3         |                      | *             |
| cover                  | 1.769      | 2.596    | 0.942    | 0.384    | 2  | 1.106    | bite            | land measure type   | 3              | 2         |                      |               |
| yard size              | 2.59       | 3.635    | 1.545    | 0.298    | 2  | 1.394    | bite            | land use land cover | 3              | 3         |                      | *             |
| not pop. density       | 6.626      | 14.233   | 3.085    | NA       | NA | NA       | bite            | land use land cover | 1              | 1         |                      | *             |
| not forest             | 1.25       | 3.506    | 0.446    | NA       | NA | NA       | bite            | land use land cover | 1              | 1         |                      |               |

|                                 |       |        |       |        |    |       |      |                     |   |   |   |   |
|---------------------------------|-------|--------|-------|--------|----|-------|------|---------------------|---|---|---|---|
| <b>coast</b>                    | 1.162 | 4.37   | 0.309 | NA     | NA | NA    | bite | land use land cover | 1 | 1 |   |   |
| <b>feed wildlife</b>            | 1.613 | 1.927  | 1.299 | 0.2027 | 1  | 3.033 | bite | property management | 2 | 2 |   | * |
| <b>activity area</b>            | 1.456 | 1.678  | 1.234 | 0.2594 | 1  | 2.317 | bite | property management | 2 | 2 |   | * |
| <b>garden</b>                   | 1.217 | 1.501  | 0.933 | 0.368  | 1  | 1.533 | bite | property management | 2 | 2 |   |   |
| <b>not fence</b>                | 1.421 | 1.806  | 1.036 | 0.5478 | 1  | 0.86  | bite | property management | 2 | 2 |   | * |
| <b>stone wall</b>               | 1.203 | 1.527  | 0.879 | 0.6922 | 1  | 0.525 | bite | property management | 2 | 2 |   |   |
| <b>not acaricide</b>            | 1.137 | 1.666  | 0.776 | NA     | NA | NA    | bite | property management | 1 | 1 |   |   |
| <b>wood pile</b>                | 1.486 | 2.36   | 0.936 | NA     | NA | NA    | bite | property management | 1 | 1 |   |   |
| <b>compost / litter / cover</b> | 1.56  | 2.483  | 0.981 | NA     | NA | NA    | bite | property management | 1 | 1 |   |   |
| <b>clothing</b>                 | 2.744 | 3.749  | 1.739 | 0.5613 | 1  | 0.824 | bite | self-protection     | 2 | 2 |   | * |
| <b>not repellent</b>            | 1.284 | 1.489  | 1.079 | 0.7107 | 4  | 0.398 | bite | self-protection     | 5 | 5 |   | * |
| <b>tick check</b>               | 1.467 | 2.344  | 0.59  | 0.7403 | 1  | 0.432 | bite | self-protection     | 2 | 2 |   |   |
| <b>not awareness</b>            | 1.113 | 1.508  | 0.718 | 0.7915 | 1  | 0.34  | bite | self-protection     | 2 | 2 |   |   |
| <b>not avoid ticks</b>          | 9.845 | 50.681 | 1.913 | NA     | NA | NA    | bite | self-protection     | 1 | 1 |   | * |
| <b>protect generic</b>          | 1.086 | 2.061  | 0.572 | NA     | NA | NA    | bite | self-protection     | 1 | 1 |   |   |
| <b>bathe</b>                    | 3.7   | 10.504 | 1.303 | NA     | NA | NA    | bite | self-protection     | 1 | 1 |   | * |
| <b>pets / animals</b>           | 1.61  | 1.835  | 1.385 | 0.0259 | 2  | 6.088 | bite | socio-demographic   | 3 | 3 | * | * |

|                           |       |       |       |        |    |       |         |                   |   |   |  |   |
|---------------------------|-------|-------|-------|--------|----|-------|---------|-------------------|---|---|--|---|
| <b>age</b>                | 3.255 | 3.651 | 2.859 | 0.0685 | 4  | 2.476 | bite    | socio-demographic | 5 | 5 |  | * |
| <b>dog</b>                | 1.855 | 2.338 | 1.372 | 0.1582 | 1  | 3.94  | bite    | socio-demographic | 2 | 2 |  | * |
| <b>male</b>               | 1.31  | 1.359 | 1.261 | 0.2074 | 3  | 1.602 | bite    | socio-demographic | 4 | 4 |  | * |
| <b>cat</b>                | 1.733 | 3.139 | 0.957 | NA     | NA | NA    | bite    | socio-demographic | 1 | 1 |  |   |
| <b>horse</b>              | 3.464 | 7.422 | 1.617 | NA     | NA | NA    | bite    | socio-demographic | 1 | 1 |  | * |
| <b>hot / dry</b>          | 5.622 | 7.017 | 4.227 | 0.248  | 2  | 1.613 | disease | abiotic           | 3 | 3 |  | * |
| <b>temperature</b>        | 1.084 | 1.097 | 1.071 | 0.3607 | 6  | 0.989 | disease | abiotic           | 7 | 7 |  | * |
| <b>precipitation</b>      | 1.06  | 1.071 | 1.049 | 0.8312 | 4  | 0.227 | disease | abiotic           | 5 | 5 |  | * |
| <b>slope</b>              | 1.357 | 2.093 | 0.879 | NA     | NA | NA    | disease | abiotic           | 1 | 1 |  |   |
| <b>soils</b>              | 2.294 | 3.055 | 1.723 | NA     | NA | NA    | disease | abiotic           | 1 | 1 |  | * |
| <b>generic abiotic</b>    | 1.015 | 1.046 | 0.985 | NA     | NA | NA    | disease | abiotic           | 1 | 1 |  |   |
| <b>travel risky area</b>  | 4.225 | 5.066 | 3.384 | 0.0568 | 2  | 4.014 | disease | activity          | 3 | 3 |  | * |
| <b>yard work</b>          | 1.346 | 1.443 | 1.249 | 0.083  | 7  | 2.021 | disease | activity          | 8 | 8 |  | * |
| <b>activity generic</b>   | 1.634 | 2.127 | 1.141 | 0.1201 | 1  | 5.239 | disease | activity          | 2 | 2 |  | * |
| <b>time in vegetation</b> | 1.733 | 1.953 | 1.513 | 0.1781 | 2  | 2.04  | disease | activity          | 3 | 3 |  | * |
| <b>walk / jog</b>         | 1.993 | 2.415 | 1.571 | 0.343  | 3  | 1.123 | disease | activity          | 4 | 4 |  | * |
| <b>hunting</b>            | 1.705 | 2.036 | 1.374 | 0.4395 | 3  | 0.889 | disease | activity          | 4 | 4 |  | * |

|                              |        |        |        |        |    |        |         |                    |    |    |   |   |
|------------------------------|--------|--------|--------|--------|----|--------|---------|--------------------|----|----|---|---|
| <b>outdoor recreation</b>    | 1.171  | 1.257  | 1.085  | 0.488  | 6  | 0.739  | disease | activity           | 7  | 7  |   | * |
| <b>fish / raft</b>           | 1.178  | 1.282  | 1.074  | 0.5273 | 5  | 0.679  | disease | activity           | 6  | 6  |   | * |
| <b>occupational exposure</b> | 1.116  | 1.175  | 1.057  | 0.5287 | 10 | 0.653  | disease | activity           | 11 | 11 |   | * |
| <b>hiking</b>                | 1.197  | 1.378  | 1.016  | 0.6757 | 3  | 0.462  | disease | activity           | 4  | 4  |   | * |
| <b>camping</b>               | 1.072  | 1.168  | 0.976  | 0.8272 | 5  | 0.23   | disease | activity           | 6  | 6  |   |   |
| <b>DON</b>                   | 45.278 | 79.743 | 10.813 | 0.0462 | 1  | 13.751 | disease | entomological risk | 2  | 2  | * | * |
| <b>ticks on pets</b>         | 2.576  | 3.649  | 1.503  | 0.1223 | 1  | 5.142  | disease | entomological risk | 2  | 2  |   | * |
| <b>tick presence</b>         | 2.771  | 3.286  | 2.256  | 0.1732 | 3  | 1.78   | disease | entomological risk | 4  | 4  |   | * |
| <b>density ticks</b>         | 1.13   | 1.154  | 1.106  | 0.4747 | 4  | 0.788  | disease | entomological risk | 5  | 5  |   | * |
| <b>DIN</b>                   | 1.199  | 1.215  | 1.183  | 0.7054 | 8  | 0.392  | disease | entomological risk | 9  | 9  |   | * |
| <b>not NIP</b>               | 1.17   | 1.256  | 1.084  | 0.801  | 1  | 0.323  | disease | entomological risk | 2  | 2  |   | * |
| <b>density infected</b>      | 1.087  | 1.128  | 1.046  | 0.9126 | 2  | 0.124  | disease | entomological risk | 3  | 3  |   | * |
| <b>infection prevalence</b>  | 1.041  | 1.061  | 1.021  | 0.9216 | 1  | 0.124  | disease | entomological risk | 2  | 2  |   | * |
| <b>not density adults</b>    | 1.013  | 1.033  | 0.993  | 0.9539 | 1  | 0.072  | disease | entomological risk | 2  | 2  |   |   |
| <b>infected prevalence</b>   | 1      | 1.235  | 0.81   | NA     | NA | NA     | disease | entomological risk | 1  | 1  |   |   |
| <b>deer</b>                  | 2.874  | 3.177  | 2.571  | 0.0203 | 6  | 3.132  | disease | host community     | 7  | 7  | * | * |
| <b>mice</b>                  | 1.127  | 1.151  | 1.103  | 0.632  | 2  | 0.56   | disease | host community     | 3  | 3  |   | * |

|                             |         |         |         |        |    |       |         |                     |    |    |     |   |
|-----------------------------|---------|---------|---------|--------|----|-------|---------|---------------------|----|----|-----|---|
| <b>not richness</b>         | 1.059   | 1.103   | 1.015   | 0.8883 | 2  | 0.159 | disease | host community      | 3  | 3  |     | * |
| <b>not groundhogs</b>       | 2.39    | 6.156   | 0.928   | NA     | NA | NA    | disease | host community      | 1  | 1  |     |   |
| <b>not deer hunt</b>        | 244.203 | 497.443 | 119.883 | NA     | NA | NA    | disease | host community      | 1  | 1  |     | * |
| <b>not deer four-poster</b> | 1.481   | 2.979   | 0.737   | NA     | NA | NA    | disease | host community      | 1  | 1  |     |   |
| <b>not fox</b>              | 20.532  | 59.053  | 7.139   | NA     | NA | NA    | disease | host community      | 1  | 1  |     | * |
| <b>lizards</b>              | 2.14    | 3.42    | 1.339   | NA     | NA | NA    | disease | host community      | 1  | 1  |     | * |
| <b>coyote</b>               | 36.089  | 111.604 | 11.67   | NA     | NA | NA    | disease | host community      | 1  | 1  |     | * |
| <b>acorns</b>               | 3.873   | 7.797   | 1.924   | NA     | NA | NA    | disease | host community      | 1  | 1  |     | * |
| <b>land use</b>             | 1.94    | 2.013   | 1.867   | 0.0038 | 11 | 3.659 | disease | land measure type   | 12 | 9  | *** | * |
| <b>cover</b>                | 2.049   | 2.055   | 2.043   | 0.0456 | 33 | 2.078 | disease | land measure type   | 34 | 22 | *   | * |
| <b>edge</b>                 | 2.49    | 2.507   | 2.473   | 0.2693 | 11 | 1.163 | disease | land measure type   | 12 | 7  |     | * |
| <b>fragmentation</b>        | 1.018   | 1.027   | 1.009   | 0.8336 | 8  | 0.217 | disease | land measure type   | 9  | 7  |     | * |
| <b>herbaceous-forest</b>    | 1.349   | 1.385   | 1.313   | 0.0038 | 3  | 8.186 | disease | land use land cover | 4  | 4  | *** | * |
| <b>not pop. density</b>     | 1.868   | 1.955   | 1.781   | 0.0278 | 8  | 2.683 | disease | land use land cover | 9  | 9  | *   | * |
| <b>yard size</b>            | 2.442   | 3.196   | 1.688   | 0.1131 | 1  | 5.568 | disease | land use land cover | 2  | 2  |     | * |
| <b>not developed</b>        | 10.627  | 10.746  | 10.508  | 0.1626 | 5  | 1.637 | disease | land use land cover | 6  | 6  |     | * |
| <b>forest</b>               | 1.068   | 1.075   | 1.061   | 0.2649 | 16 | 1.155 | disease | land use land cover | 17 | 17 |     | * |



|                                 |       |       |       |        |    |       |         |                     |   |   |   |   |
|---------------------------------|-------|-------|-------|--------|----|-------|---------|---------------------|---|---|---|---|
| <b>cover generic</b>            | 1.047 | 1.059 | 1.035 | 0.323  | 5  | 1.096 | disease | land use land cover | 6 | 6 |   | * |
| <b>not developed-forest</b>     | 5.255 | 5.329 | 5.181 | 0.4    | 4  | 0.941 | disease | land use land cover | 5 | 5 |   | * |
| <b>ndvi</b>                     | 1.698 | 2.014 | 1.382 | 0.5501 | 1  | 0.854 | disease | land use land cover | 2 | 2 |   | * |
| <b>herbaceous</b>               | 1.159 | 1.203 | 1.115 | 0.5911 | 6  | 0.567 | disease | land use land cover | 7 | 7 |   | * |
| <b>not developed-herbaceous</b> | 2.877 | 3.887 | 1.867 | 0.6825 | 1  | 0.545 | disease | land use land cover | 2 | 2 |   | * |
| <b>water</b>                    | 1.03  | 1.049 | 1.011 | 0.8344 | 2  | 0.237 | disease | land use land cover | 3 | 3 |   | * |
| <b>coast</b>                    | 1.07  | 1.121 | 1.019 | 0.8815 | 1  | 0.188 | disease | land use land cover | 2 | 2 |   | * |
| <b>not isolation</b>            | 1.03  | 1.053 | 1.006 | NA     | NA | NA    | disease | land use land cover | 1 | 1 |   | * |
| <b>age housing</b>              | 2.044 | 3.532 | 1.183 | NA     | NA | NA    | disease | land use land cover | 1 | 1 |   | * |
| <b>garden</b>                   | 1.303 | 1.516 | 1.09  | 0.0463 | 2  | 4.485 | disease | property management | 3 | 3 | * | * |
| <b>not acaricide</b>            | 1.414 | 1.649 | 1.179 | 0.1134 | 3  | 2.217 | disease | property management | 4 | 4 |   | * |
| <b>wood pile</b>                | 1.671 | 1.83  | 1.512 | 0.1228 | 3  | 2.132 | disease | property management | 4 | 4 |   | * |
| <b>stone wall</b>               | 1.461 | 1.598 | 1.324 | 0.2099 | 3  | 1.591 | disease | property management | 4 | 4 |   | * |
| <b>landscape control</b>        | 2.397 | 3.134 | 1.66  | 0.2546 | 2  | 1.581 | disease | property management | 3 | 3 |   | * |
| <b>feed wildlife</b>            | 1.218 | 1.329 | 1.107 | 0.3813 | 5  | 0.96  | disease | property management | 6 | 6 |   | * |
| <b>compost / litter / cover</b> | 1.184 | 1.407 | 0.961 | 0.7026 | 2  | 0.44  | disease | property management | 3 | 3 |   |   |

|                            |       |       |       |        |    |       |         |                     |    |    |     |   |
|----------------------------|-------|-------|-------|--------|----|-------|---------|---------------------|----|----|-----|---|
| <b>not fence</b>           | 1.019 | 1.223 | 0.815 | 0.9625 | 2  | 0.053 | disease | property management | 3  | 3  |     |   |
| <b>rodent tick control</b> | 1.515 | 4.111 | 0.559 | NA     | NA | NA    | disease | property management | 1  | 1  |     |   |
| <b>activity area</b>       | 1.012 | 1.865 | 0.549 | NA     | NA | NA    | disease | property management | 1  | 1  |     |   |
| <b>not bathe</b>           | 1.801 | 2.243 | 1.359 | 0.1144 | 1  | 5.506 | disease | self-protection     | 2  | 2  |     | * |
| <b>not clothing</b>        | 1.128 | 1.167 | 1.089 | 0.2901 | 11 | 1.111 | disease | self-protection     | 12 | 12 |     | * |
| <b>not avoid ticks</b>     | 1.492 | 1.805 | 1.179 | 0.3062 | 2  | 1.363 | disease | self-protection     | 3  | 3  |     | * |
| <b>not repellent</b>       | 1.038 | 1.074 | 1.002 | 0.5706 | 13 | 0.582 | disease | self-protection     | 14 | 14 |     | * |
| <b>not tick check</b>      | 1.03  | 1.046 | 1.014 | 0.6323 | 11 | 0.492 | disease | self-protection     | 12 | 12 |     | * |
| <b>awareness</b>           | 1.067 | 1.181 | 0.953 | 0.6863 | 5  | 0.428 | disease | self-protection     | 6  | 6  |     |   |
| <b>protect generic</b>     | 1.019 | 1.194 | 0.844 | 0.9495 | 3  | 0.069 | disease | self-protection     | 4  | 4  |     |   |
| <b>cat</b>                 | 1.283 | 1.448 | 1.118 | 0.005  | 4  | 5.61  | disease | socio-demographic   | 5  | 5  | *** | * |
| <b>white</b>               | 4.143 | 4.301 | 3.985 | 0.0079 | 5  | 4.277 | disease | socio-demographic   | 6  | 6  | *** | * |
| <b>other vs. black</b>     | 4.315 | 6.064 | 2.566 | 0.1092 | 1  | 5.773 | disease | socio-demographic   | 2  | 2  |     | * |
| <b>pets / animals</b>      | 1.267 | 1.392 | 1.142 | 0.1533 | 4  | 1.76  | disease | socio-demographic   | 5  | 5  |     | * |
| <b>horse</b>               | 1.483 | 1.791 | 1.175 | 0.1684 | 3  | 1.807 | disease | socio-demographic   | 4  | 4  |     | * |
| <b>not Hispanic</b>        | 1.914 | 1.981 | 1.847 | 0.1759 | 4  | 1.642 | disease | socio-demographic   | 5  | 5  |     | * |
| <b>residence time</b>      | 1.491 | 1.6   | 1.382 | 0.202  | 4  | 1.525 | disease | socio-demographic   | 5  | 5  |     | * |

|                        |       |       |       |        |    |       |         |                   |   |   |  |   |
|------------------------|-------|-------|-------|--------|----|-------|---------|-------------------|---|---|--|---|
| <b>not dog</b>         | 1.122 | 1.262 | 0.982 | 0.5985 | 4  | 0.571 | disease | socio-demographic | 5 | 5 |  |   |
| <b>income</b>          | 1.124 | 1.173 | 1.075 | 0.7109 | 4  | 0.398 | disease | socio-demographic | 5 | 5 |  | * |
| <b>parent</b>          | 1.36  | 1.828 | 1.012 | NA     | NA | NA    | disease | socio-demographic | 1 | 1 |  | * |
| <b>American Indian</b> | 4.393 | 6.977 | 2.766 | NA     | NA | NA    | disease | socio-demographic | 1 | 1 |  | * |
| <b>employment</b>      | 1.041 | 1.634 | 0.663 | NA     | NA | NA    | disease | socio-demographic | 1 | 1 |  |   |
| <b>higher ed.</b>      | 1.4   | 1.836 | 1.068 | NA     | NA | NA    | disease | socio-demographic | 1 | 1 |  | * |

## Web Figure 1.

Preferred Reporting Items for Systematic Reviews and Meta-Analyses (PRISMA) diagram.

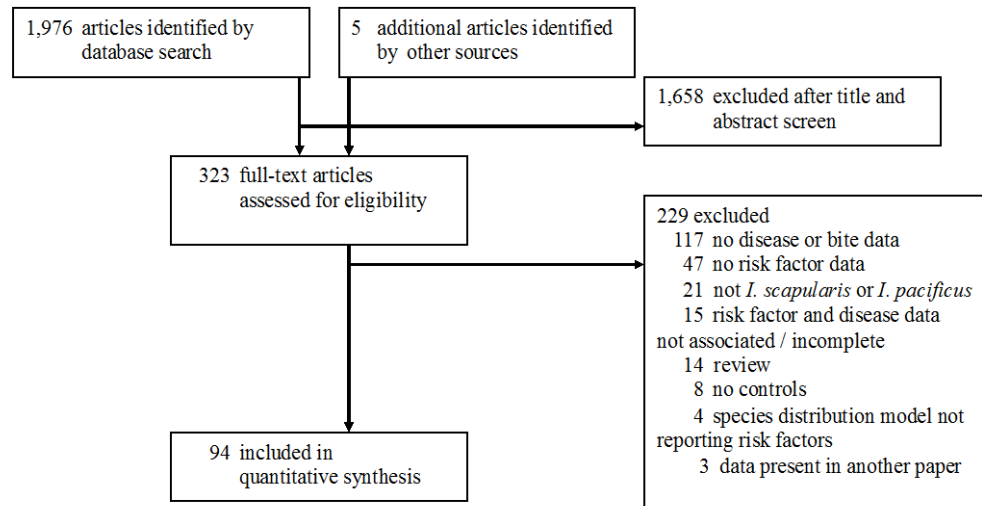

## Web Figure 2.

Estimates of odds ratios for risk factors for tick-borne disease. Error bars depict 95% confidence intervals. Data have been plotted on a log scale.

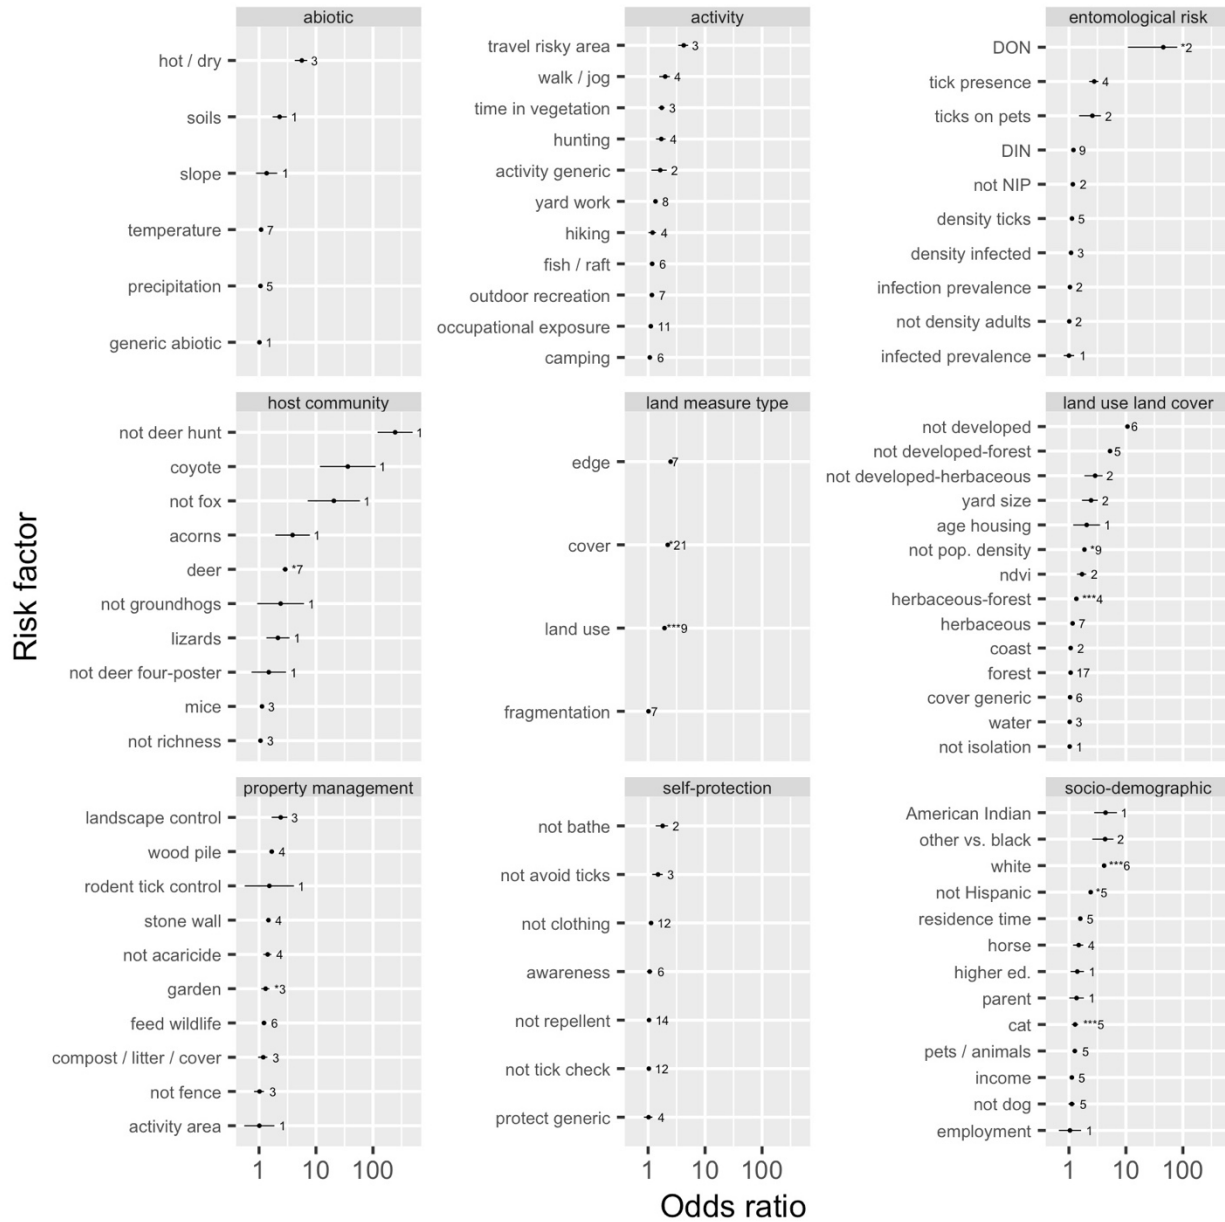

### Web Figure 3.

Estimates of odds ratios for risk factors for tick bites, plotted on a log scale. Error bars depict 95% confidence intervals. Where “not” precedes a factor, this indicates the result is for the opposite of that factor. For example, “not awareness” means lack of awareness; “not activity generic” means not doing generic activity that exposes one to ticks.

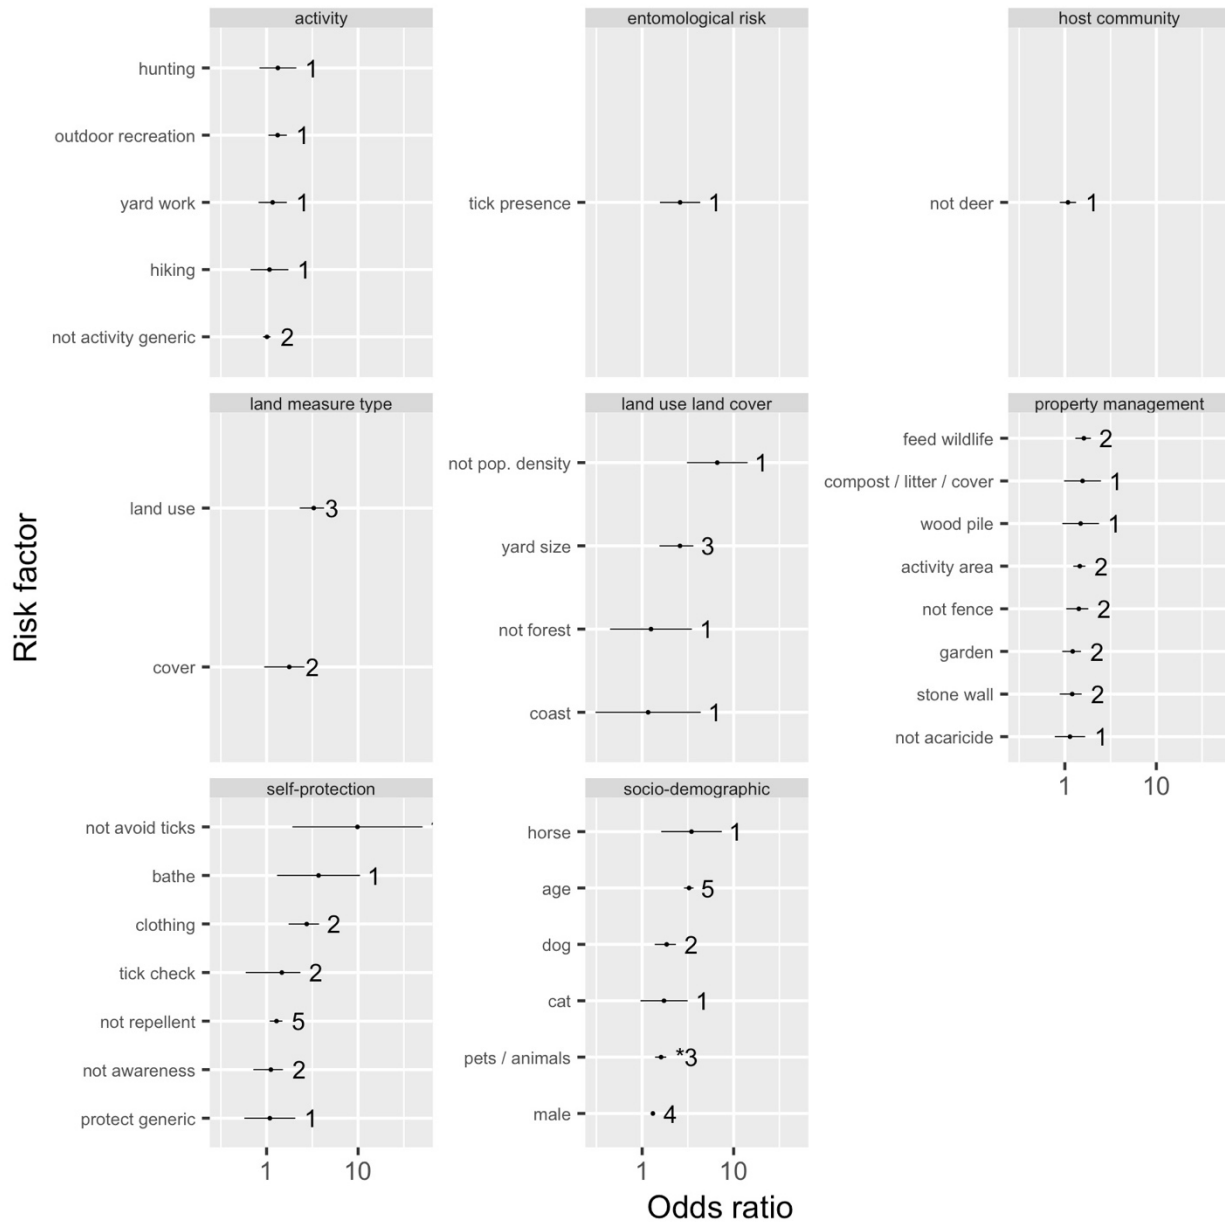

### Web Figure 4.

Funnel plot depicting observed effect size (log odds ratio) versus standard error in the log odds ratio for disease data. Without publication bias or other sources of heterogeneity, most points would be expected to lie within the white pseudo-confidence region. The pseudo-confidence region has bounds  $\theta \pm 1.96SE$ , where  $\theta$  is the estimated log odds ratio values based on an intercept-only mixed model fitted to the data, and  $SE$  is the standard error value relative to the y-axis (1).

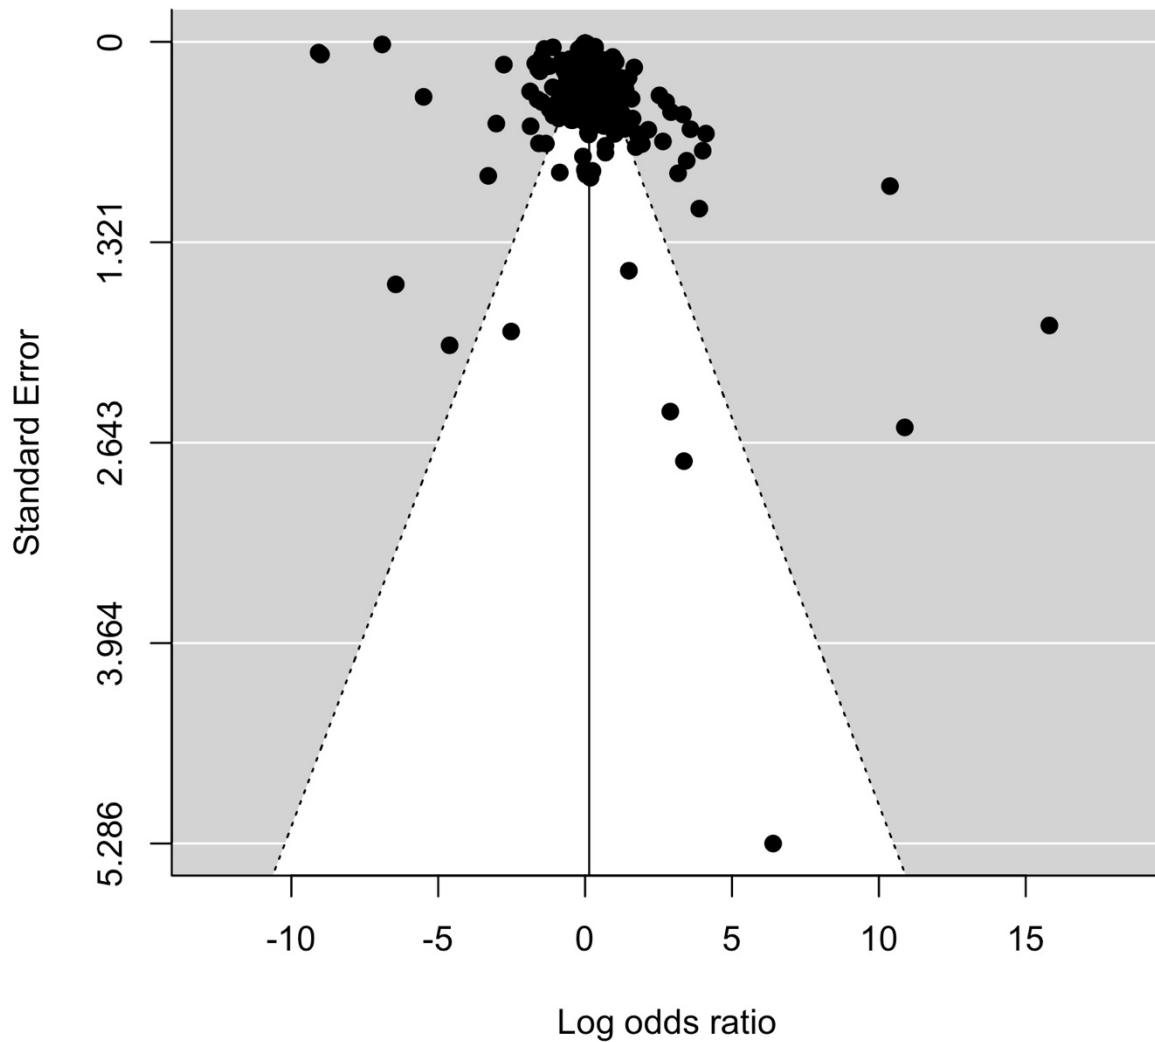

**Web Figure 5.**

Funnel plot depicting observed effect size (log odds ratio) versus standard error in the log odds ratio for tick bite data. Without publication bias or other sources of heterogeneity, most points are expected to lie inside the white pseudo-confidence region.

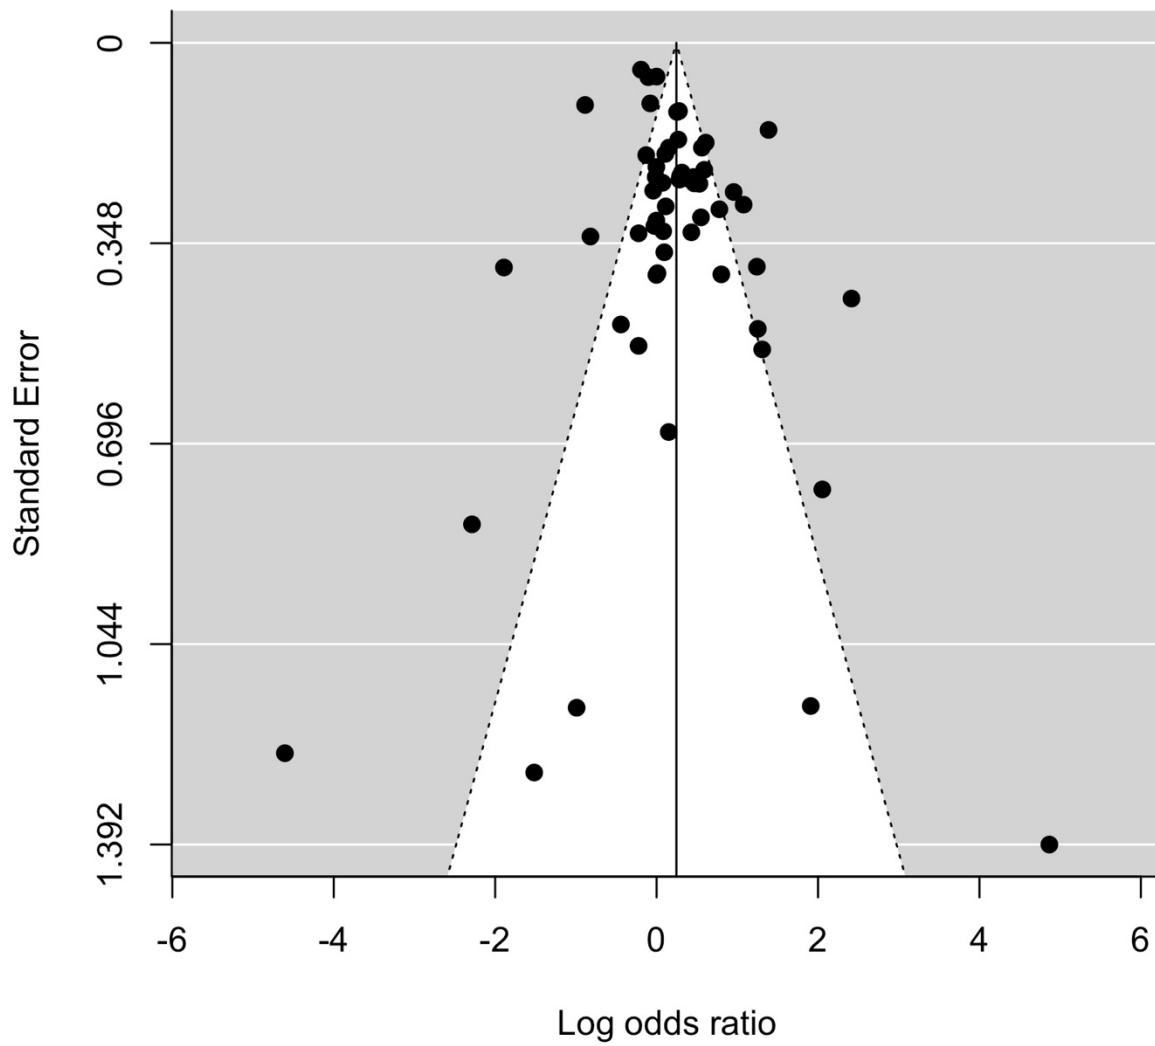



## References

1. Sterne JAC, Egger M. Funnel plots for detecting bias in meta-analysis: Guidelines on choice of axis. *Journal of Clinical Epidemiology* 2001;54(10):1046-55.
2. Centers for Disease Control. Lyme disease data tables: Reported cases of Lyme disease by state or locality, 2006-2016. 2017. (<https://www.cdc.gov/lyme/stats/tables.html>). (Accessed 27 August 2018).
3. U.S. Census Bureau. Geographic Terms and Concepts: Census Divisions and Census Regions. 2015. ([https://www.census.gov/geo/reference/gtc/gtc\\_census\\_divreg.html](https://www.census.gov/geo/reference/gtc/gtc_census_divreg.html)). (Accessed 15 December 2017).
4. Government of Canada. National Lyme disease surveillance in Canada 2013: web report. 2015. (<https://www.canada.ca/en/public-health/services/publications/diseases-conditions/national-lyme-disease-surveillance-canada-2013-web-report.html>). (Accessed 27 August 2018).
5. Centers for Disease Control. Lyme Disease. 2018. (<https://www.cdc.gov/lyme/index.html>). (Accessed February 9 2018).
6. Stafford KC. *Tick management handbook: an integrated guide for homeowners, pest control operators, and public health officials for the prevention of tick-associated disease*. Connecticut Agricultural Experiment Station; 2004.
7. Viechtbauer W. Conducting Meta-Analyses in R with the metafor Package. *Journal of Statistical Software* 2010;36(3):1-48.
8. Borenstein M, Hedges LV, Higgins JPT, et al. Converting among effect sizes. *Introduction to meta-analysis*: John Wiley & Sons, Ltd, 2009:45-9.
9. Altman DG, Bland JM. How to obtain the confidence interval from a P value. *BMJ : British Medical Journal* 2011;343.
10. Ellington EH, Bastille-Rousseau G, Austin C, et al. Using multiple imputation to estimate missing data in meta-regression. *Methods in Ecology and Evolution* 2015;6(2):153-63.
11. National Cancer Institute. Download U.S. population data — 1969-2016. 2017. (<https://seer.cancer.gov/popdata/download.html>). (Accessed 1 October, 2018 2018).
12. Pearce N. Effect measures in prevalence studies. *Environmental Health Perspectives* 2004;112(10):1047-50.
13. Saman DM, Kavanagh KT, Johnson B, et al. Can Inpatient Hospital Experiences Predict Central Line-Associated Bloodstream Infections? *PLoS ONE* 2013;8(4):e61097.
14. Freeman L, Neckerman K, Schwartz-Soicher O, et al. Neighborhood Walkability and Active Travel (Walking and Cycling) in New York City. *Journal of Urban Health : Bulletin of the New York Academy of Medicine* 2013;90(4):575-85.
15. Samuels ML, Witmer JA. *Statistics for the life sciences*. 4th ed. New York, NY, USA: Prentice-Hall; 2012.
16. Zar J. *Biostatistical analysis*. New York, NY, USA: Prentice Hall; 1999.
